# Supplementary material for: Isolation and Derivatization of Bioactive Compounds from Zingiber zerumbet Essential Oil with Antifungal Activity Against Rice Pathogens
Source: Research Square preprint supplement (doi:10.21203/rs.3.rs-6116554/v1), 2025-04-21

**Supporting Information**

**Isolation and Derivatization of Bioactive Compounds from Zingiber zerumbet Essential Oil with Antifungal Activity Against Rice Pathogens**

Navneet Kaur,1 Ramandeep Kaur,1* Urvashi Bhardwaj,1 and Parul Sharma2

1Department of Chemistry, College of Basic Sciences and Humanities, Punjab Agricultural University, Ludhiana, India-141004

2Department of Chemistry, Oklahoma State University, Stillwater, Oklahoma, USA-74075


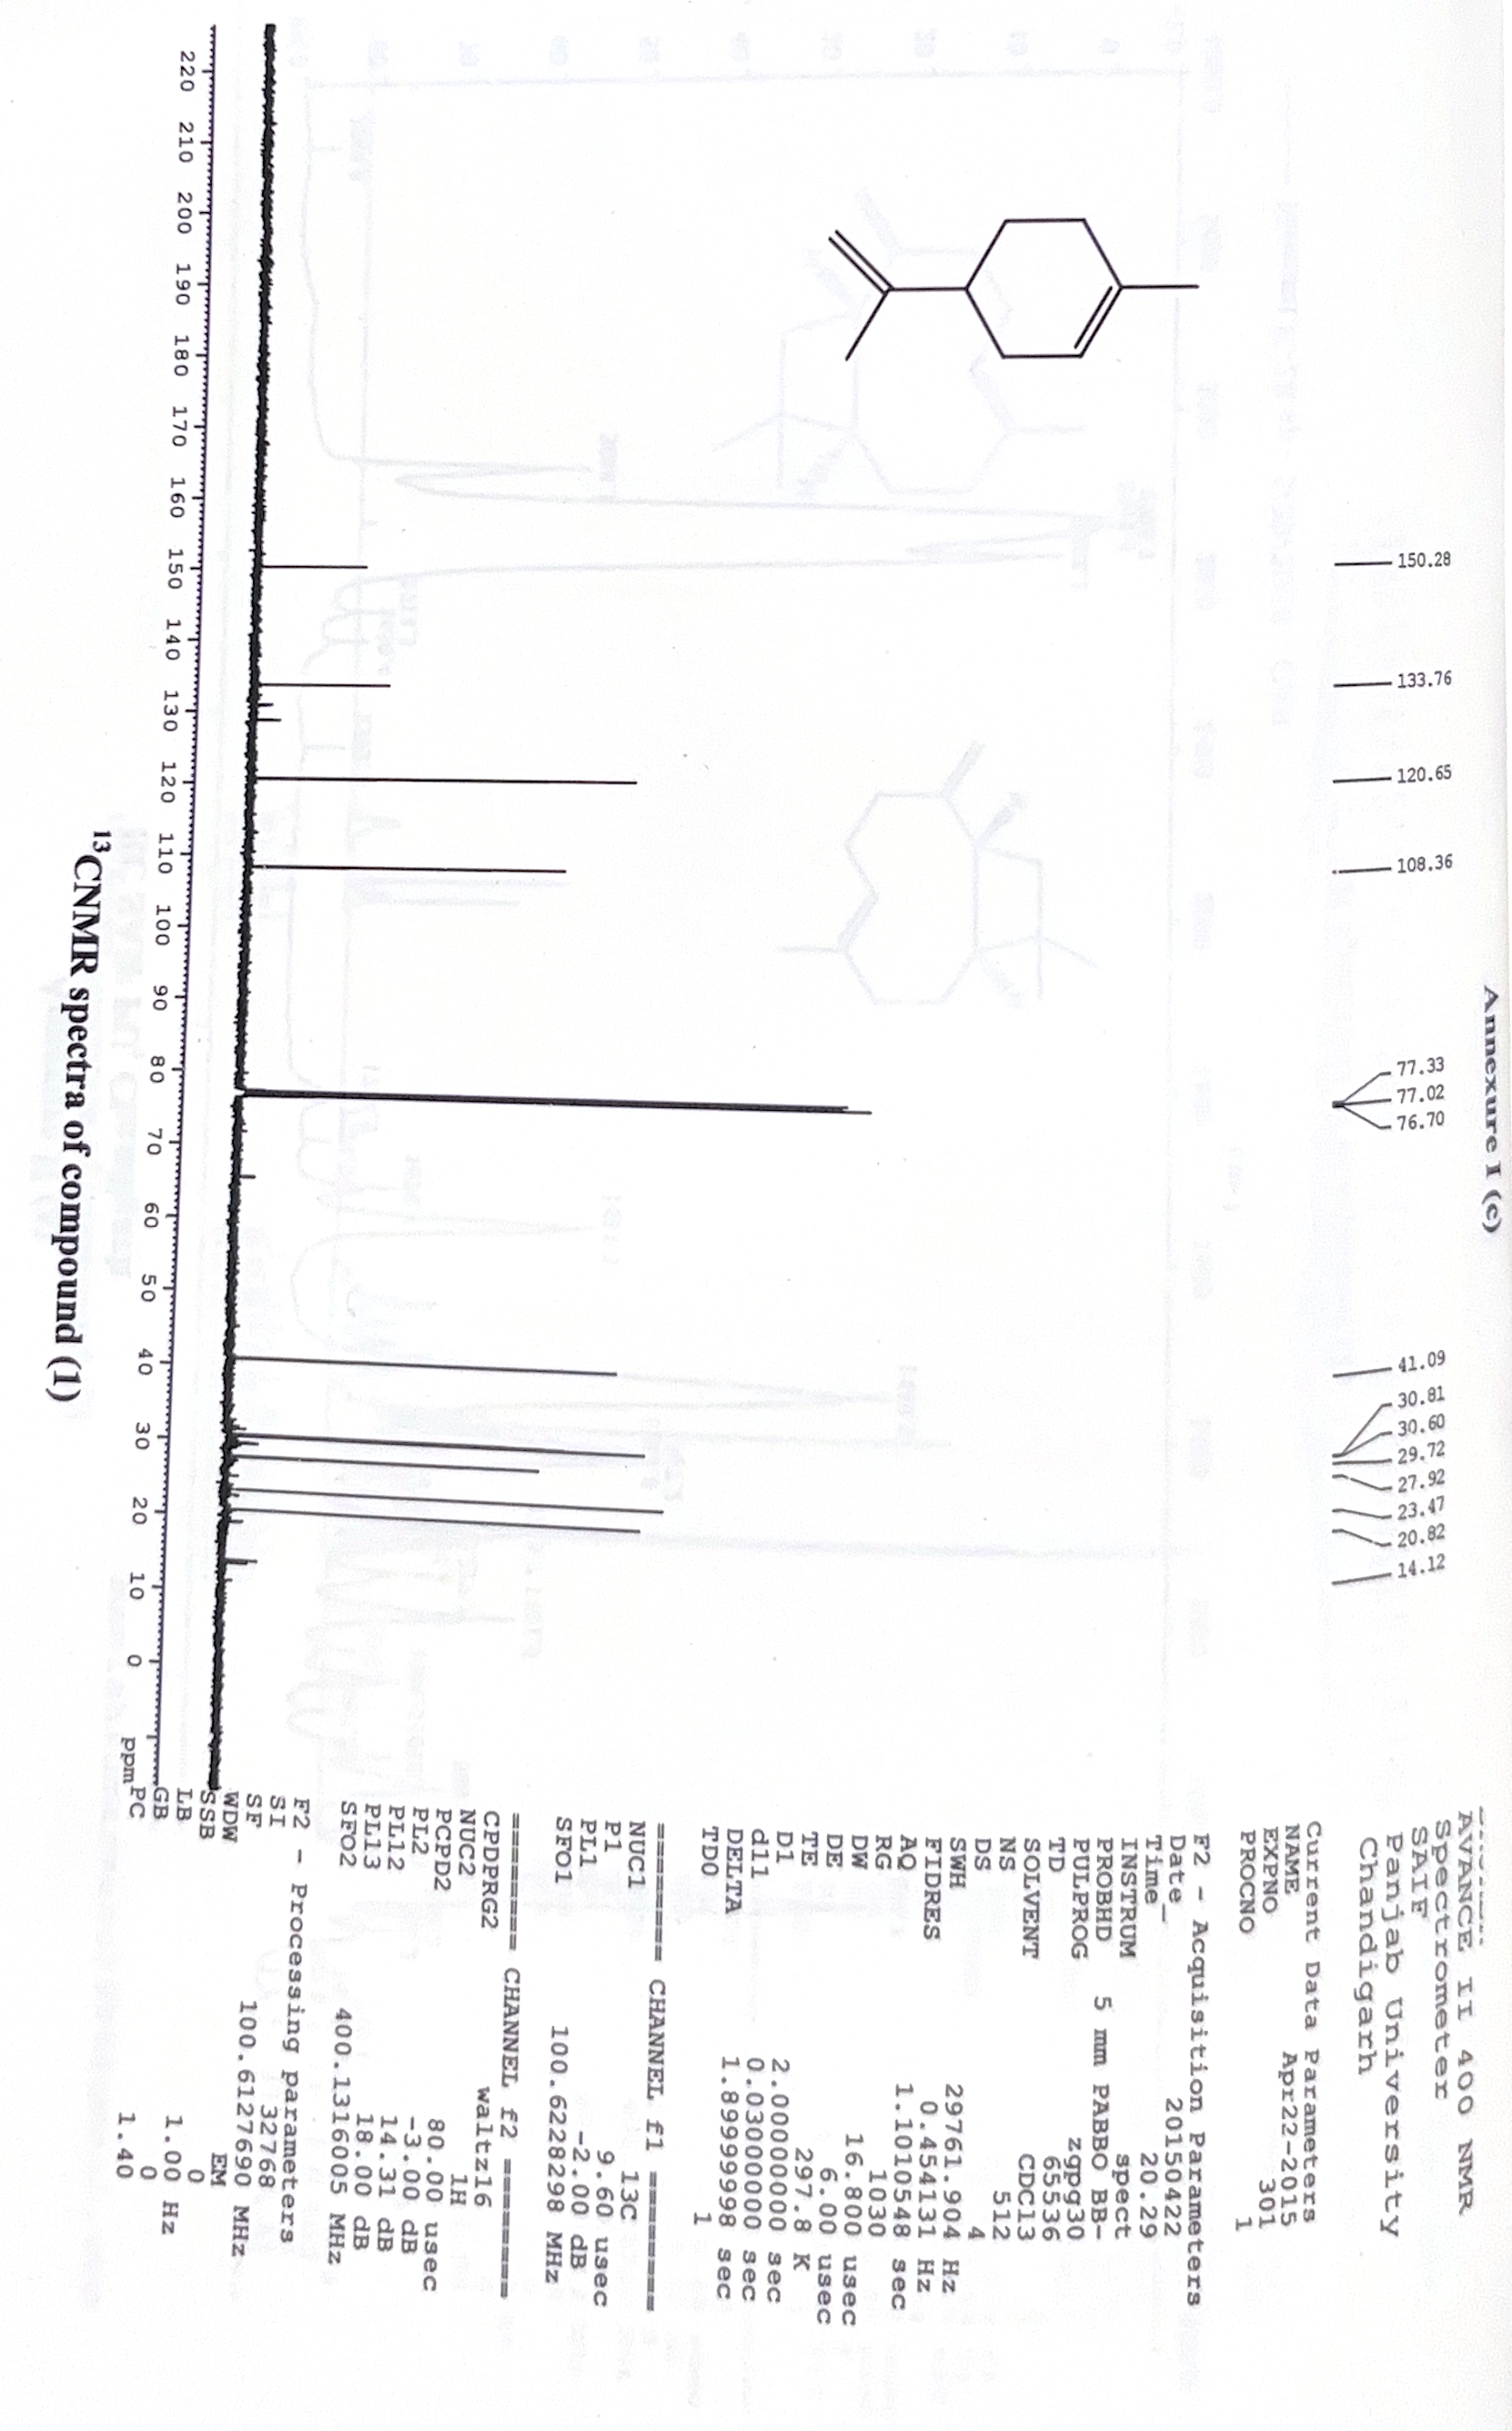

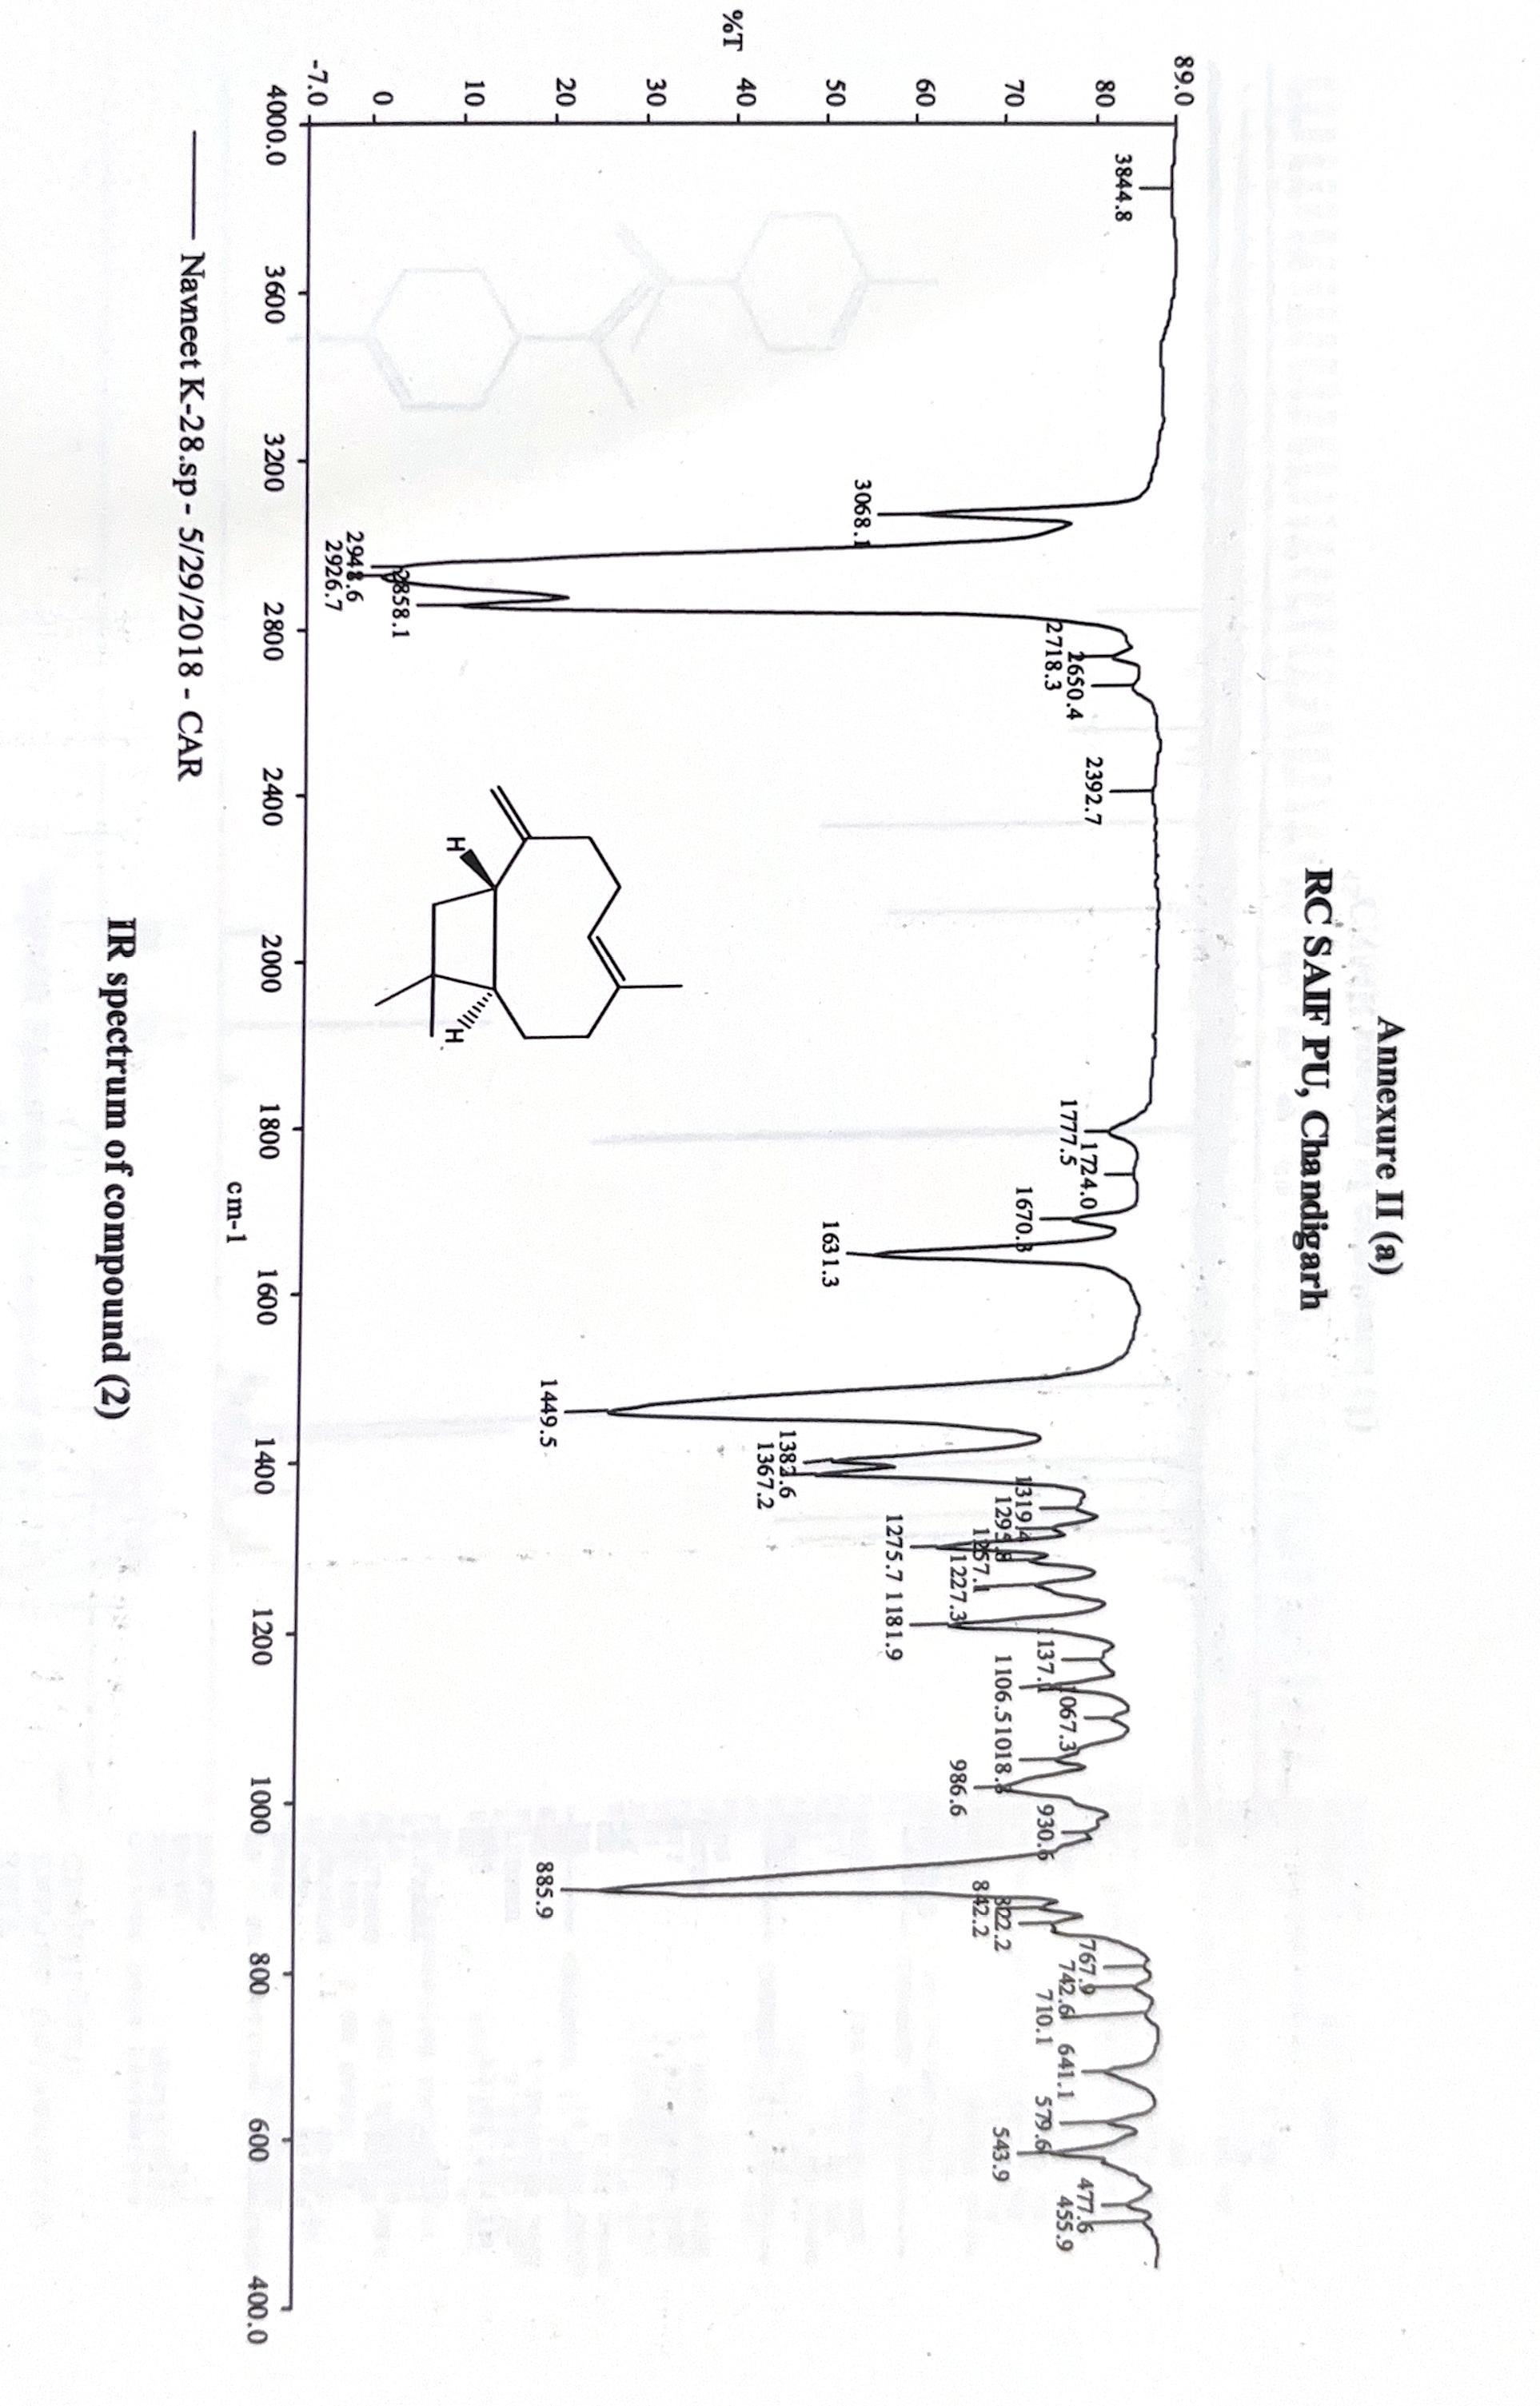

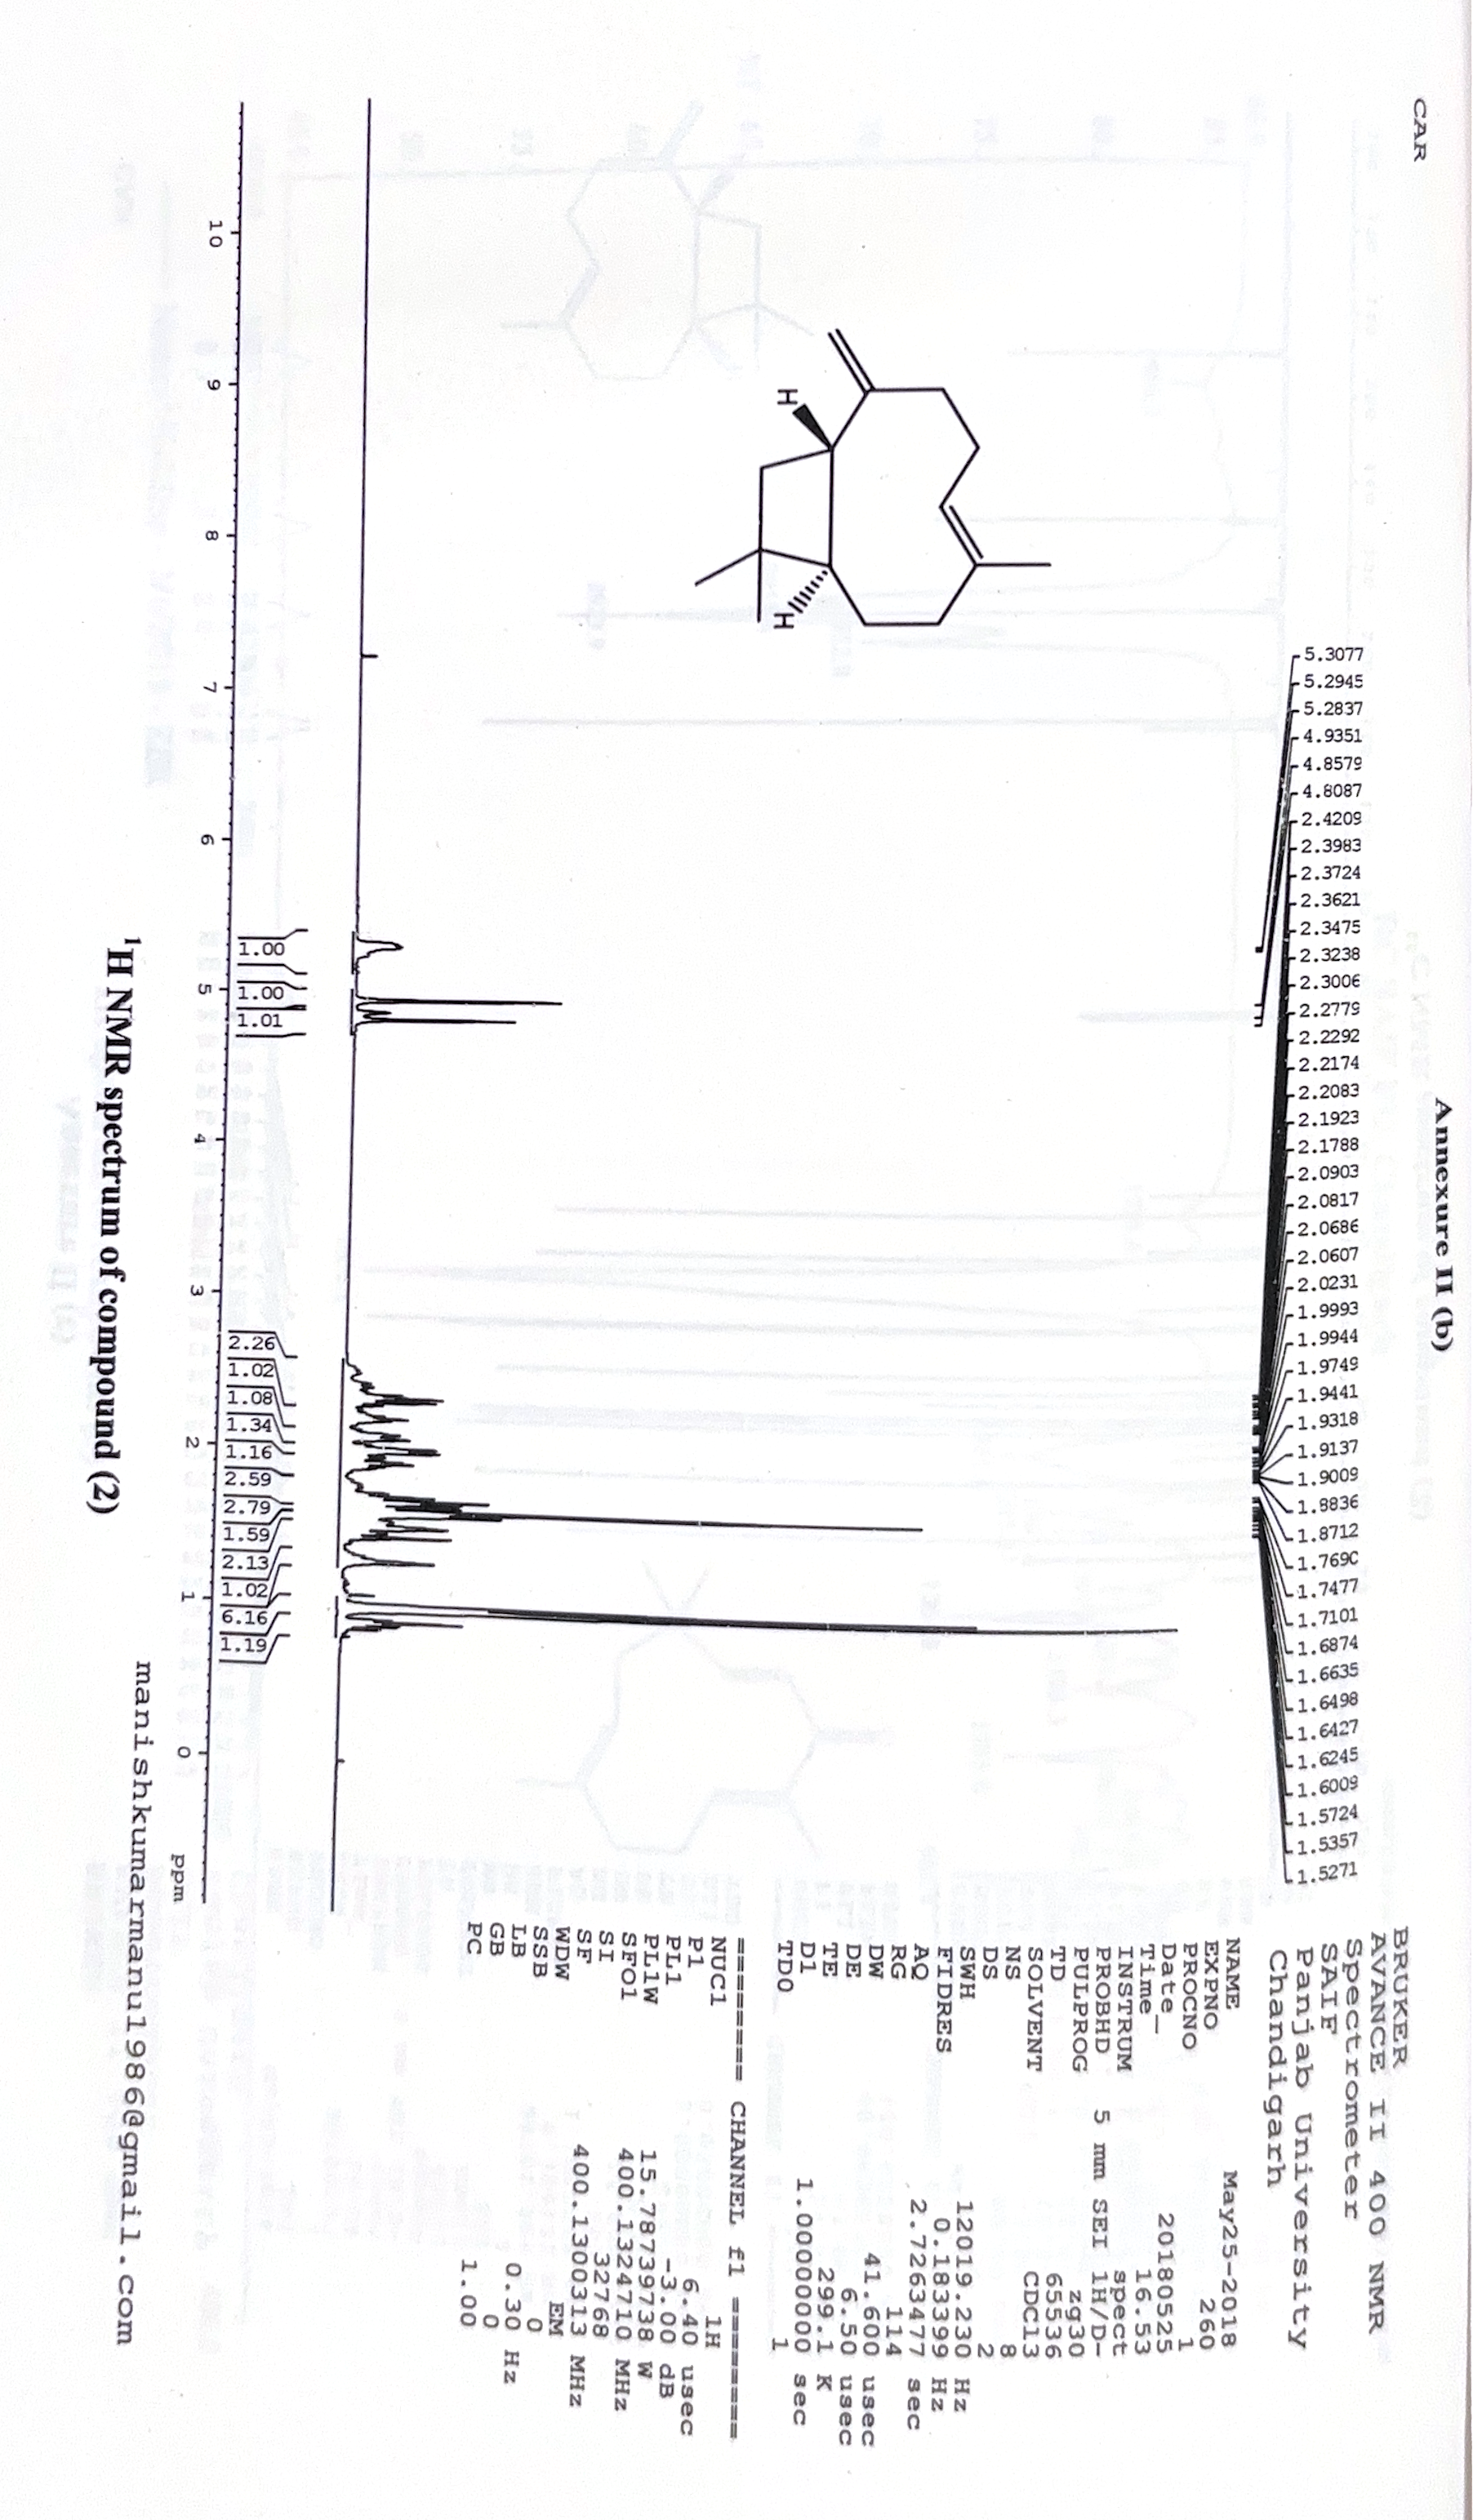

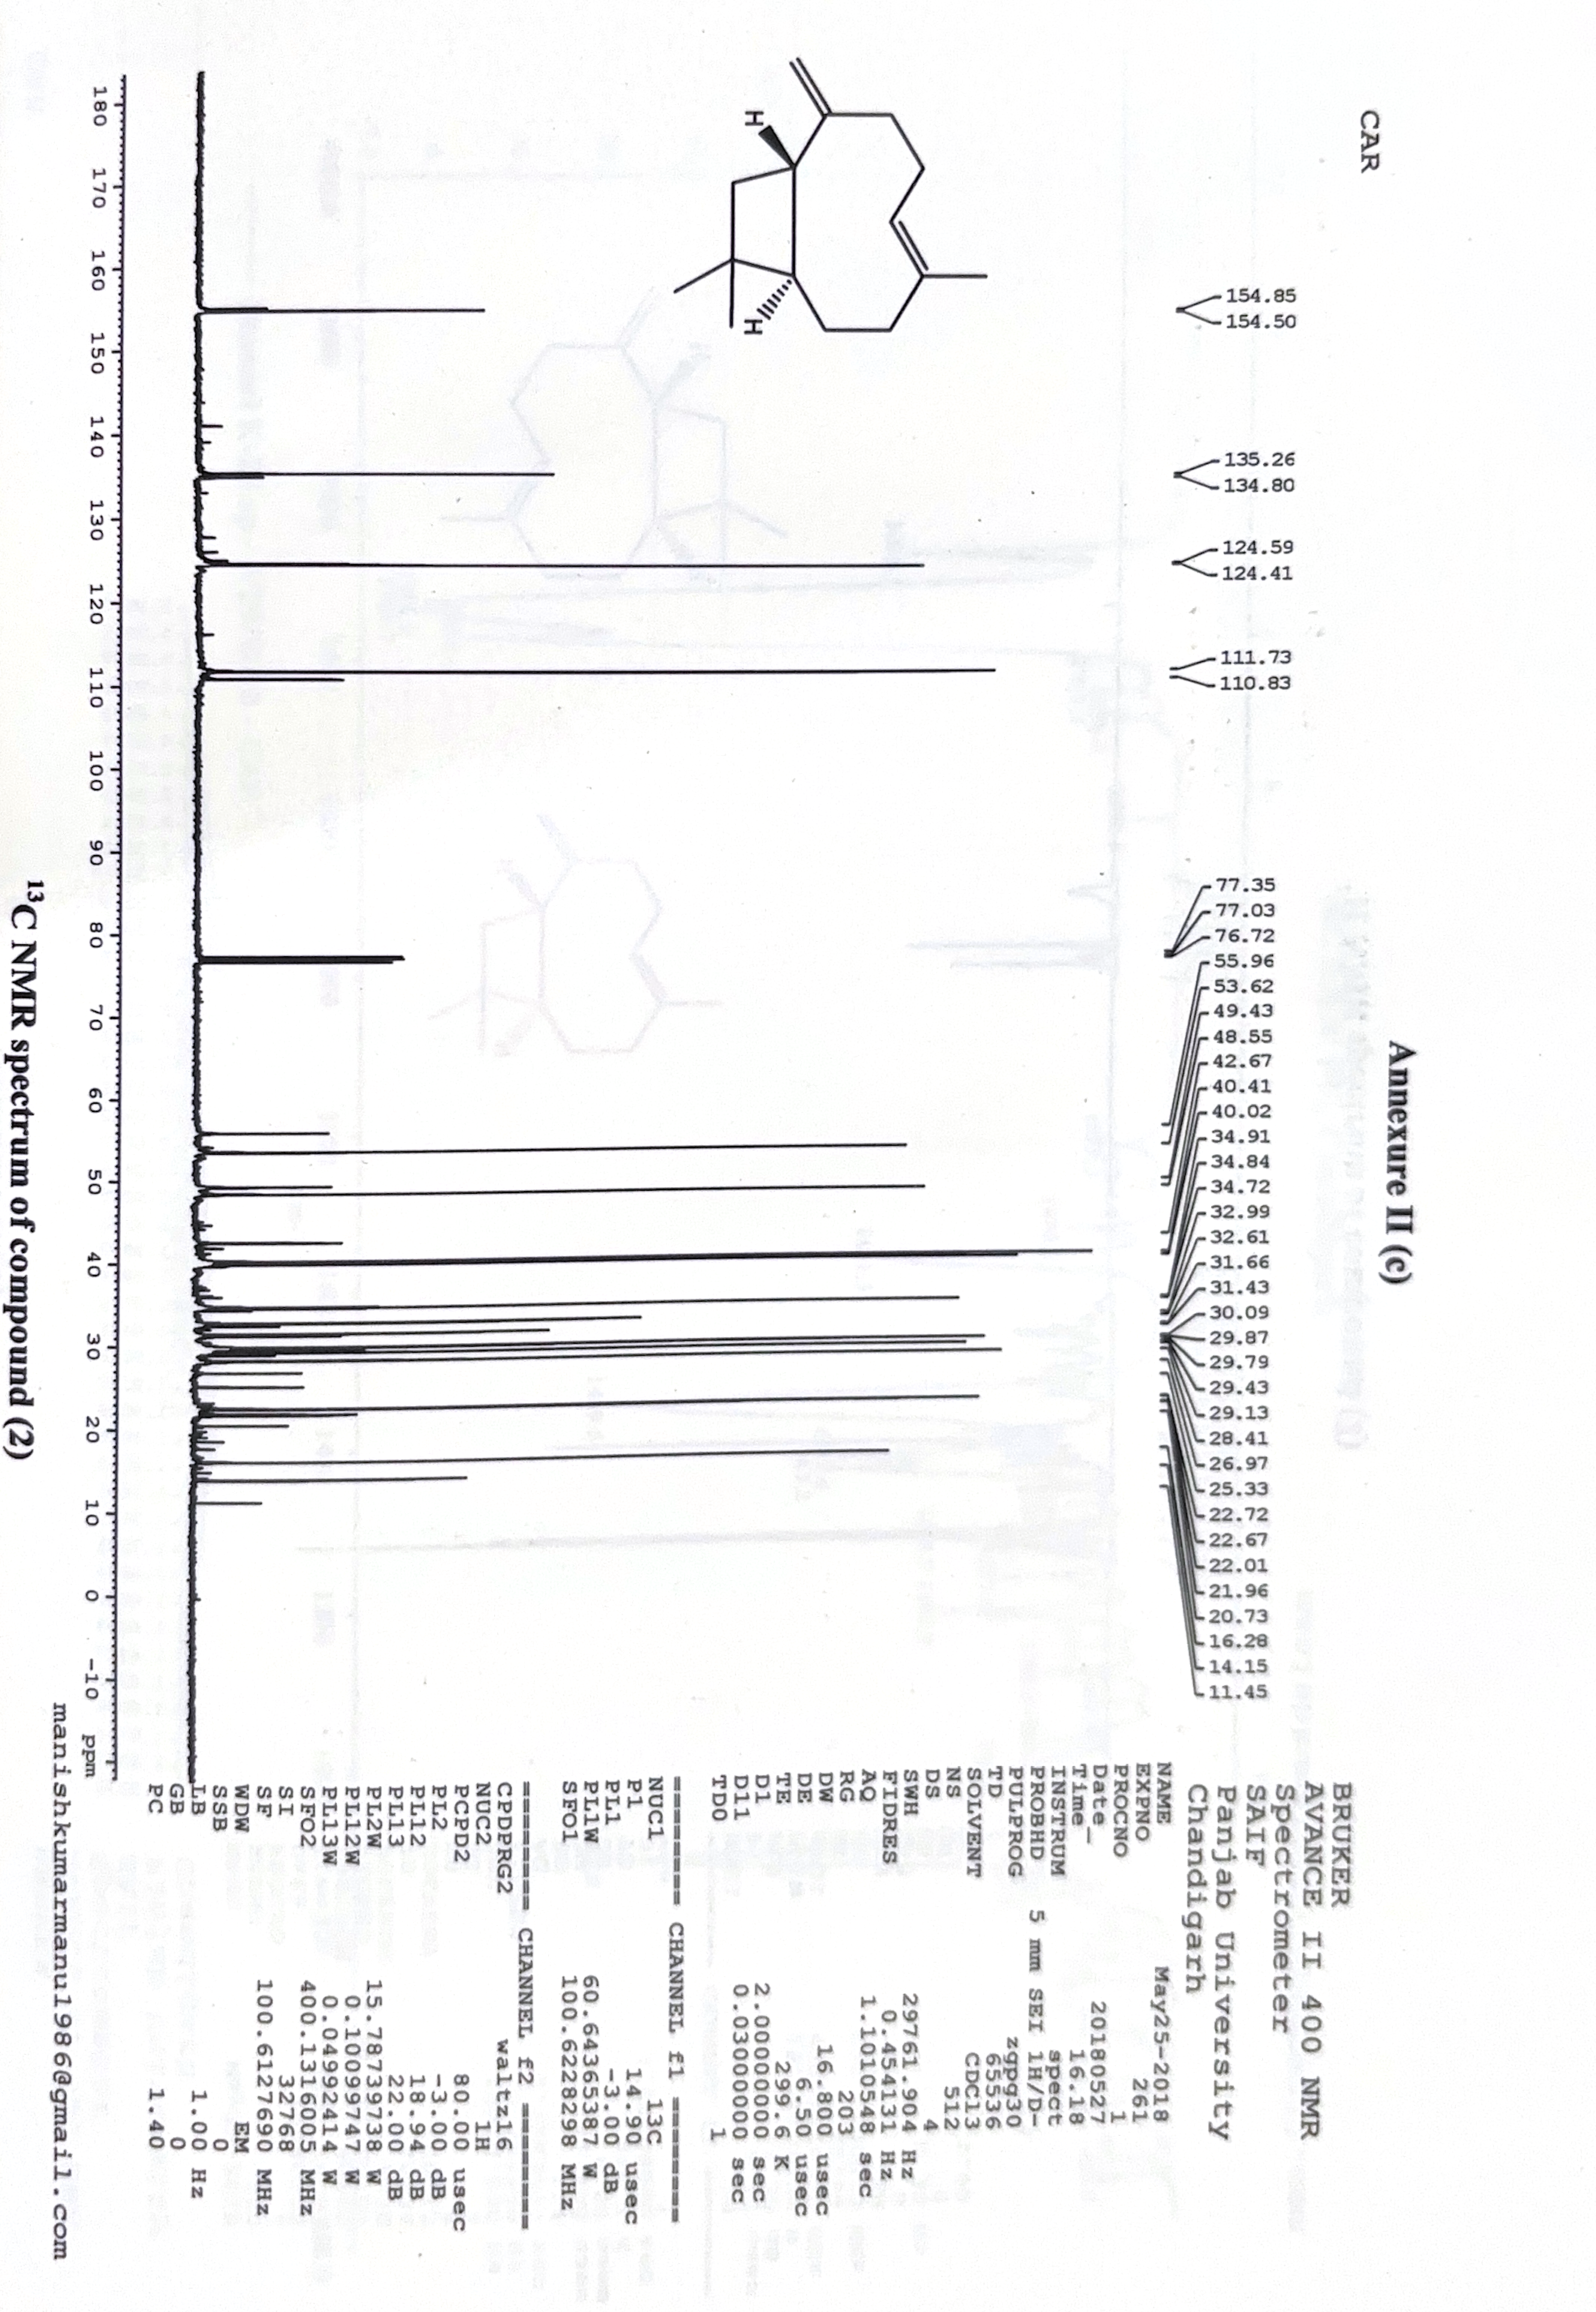

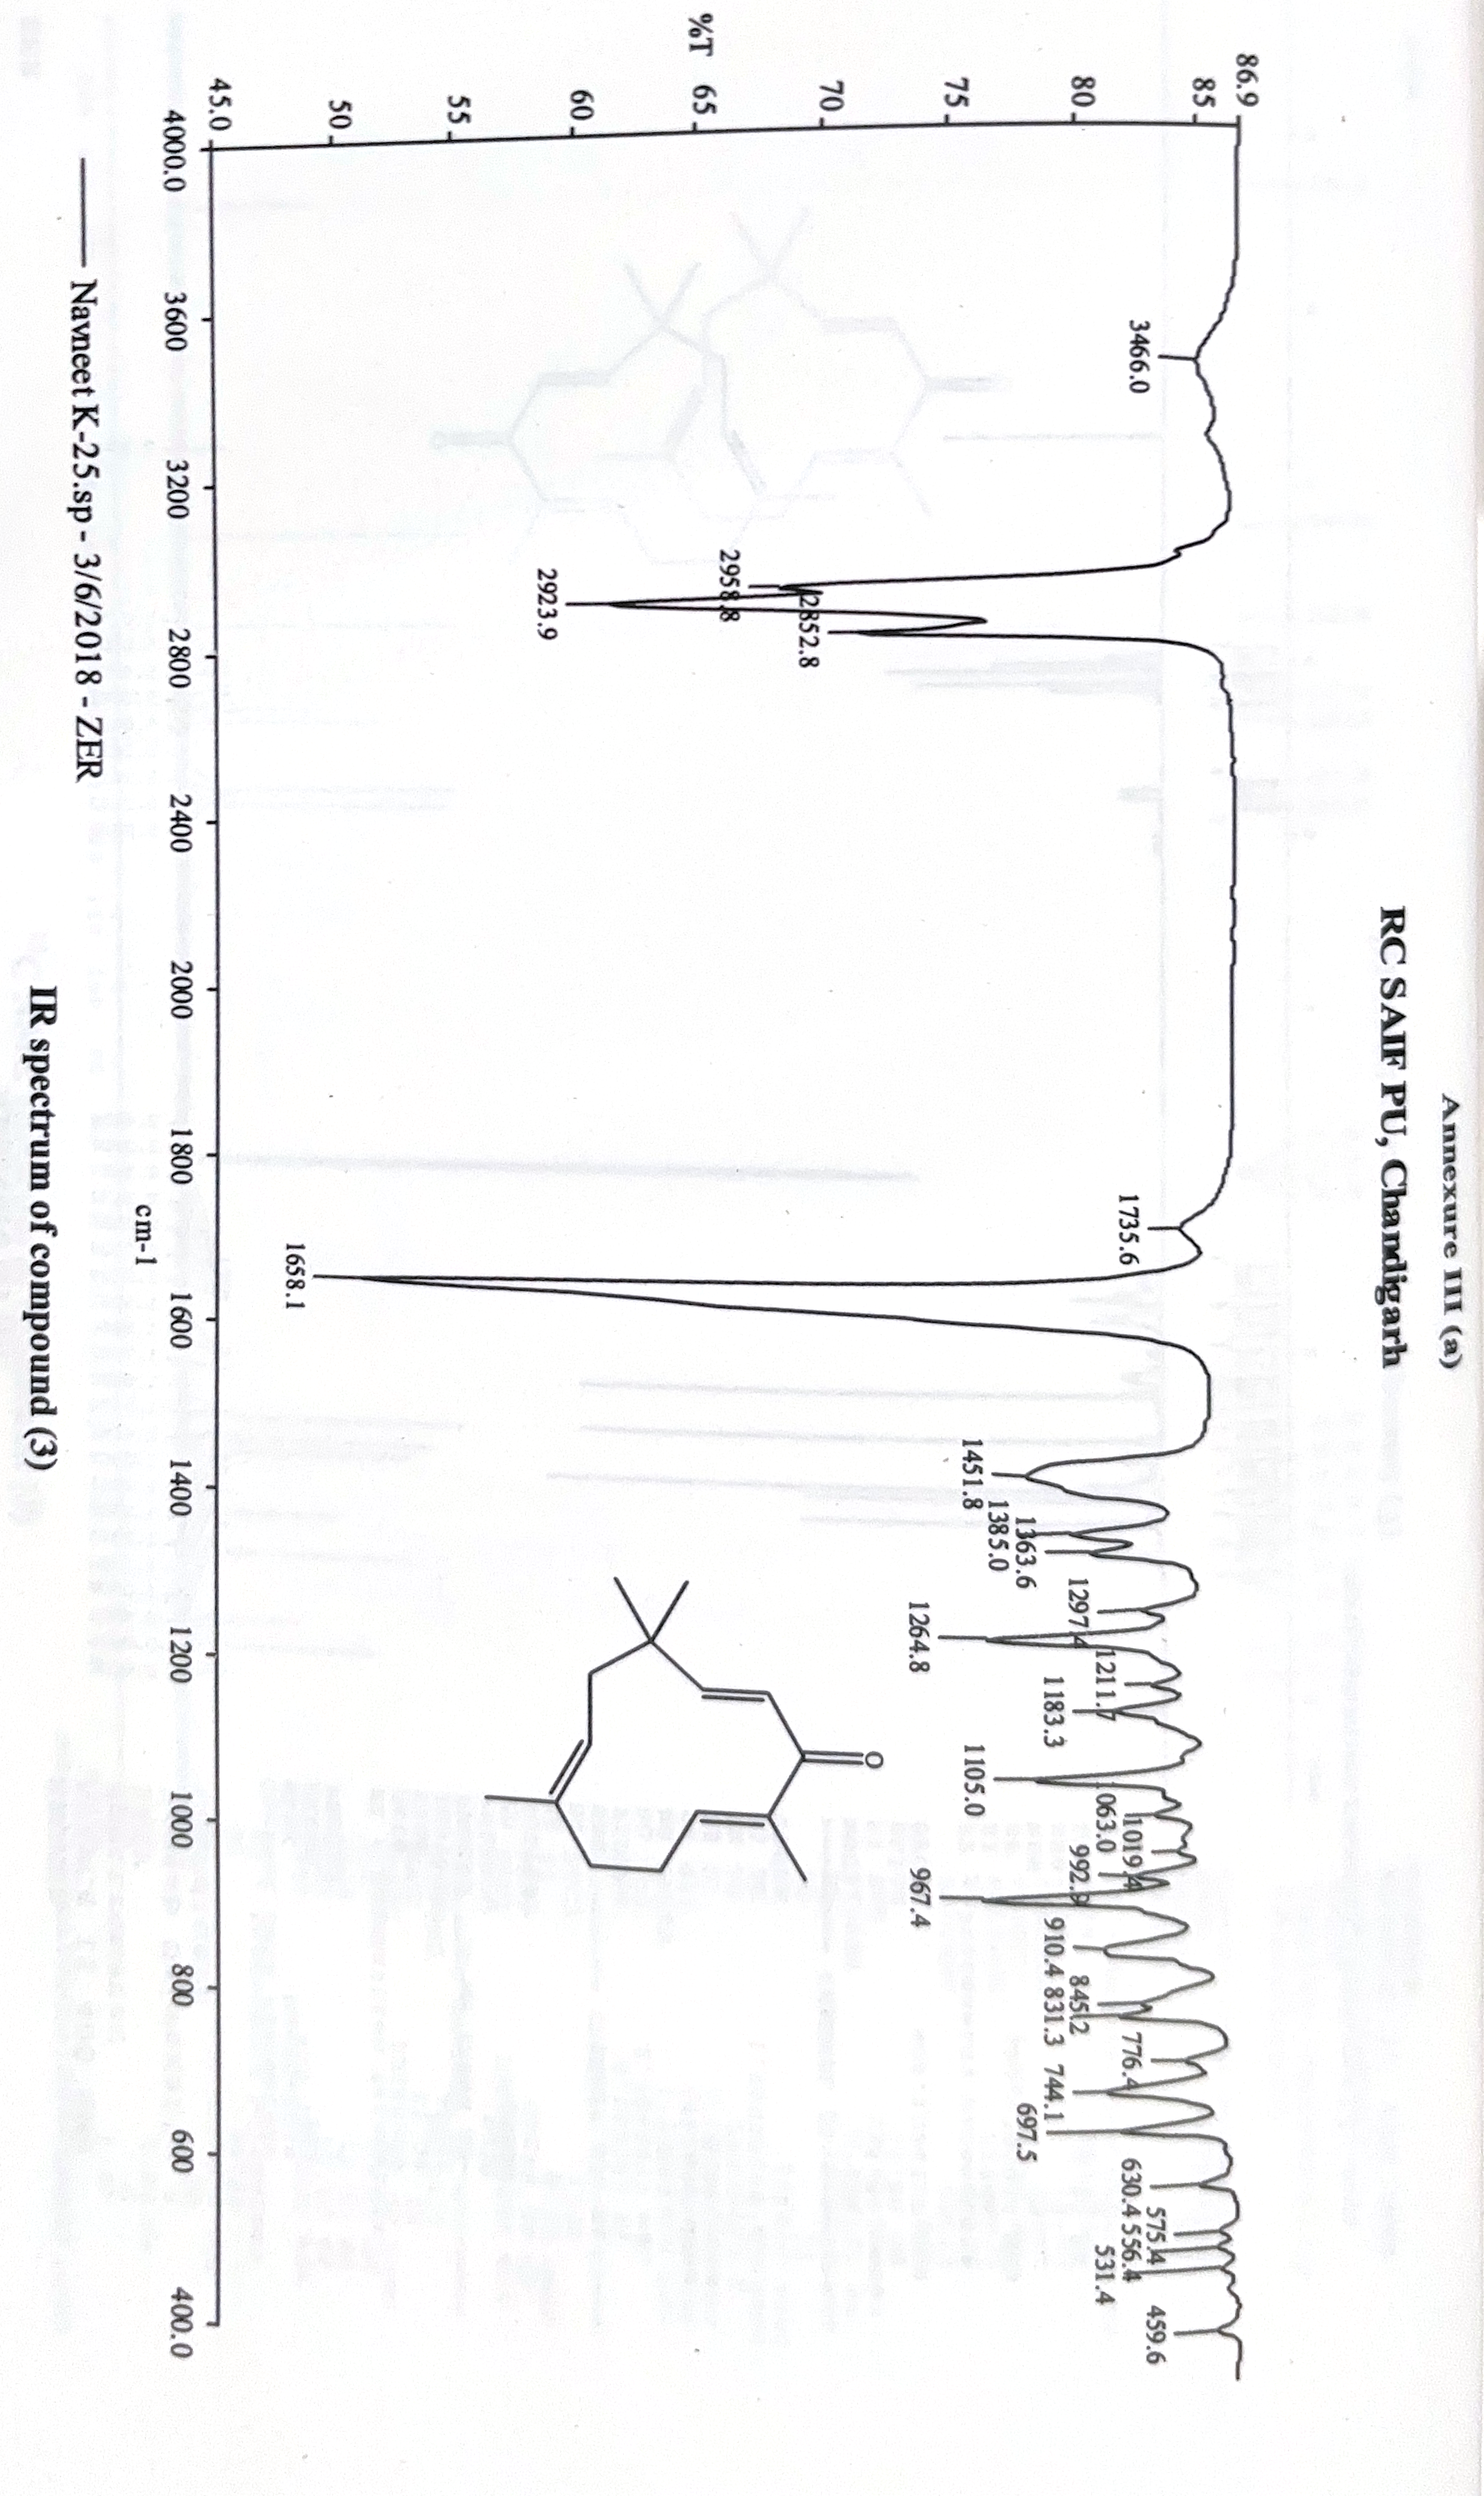

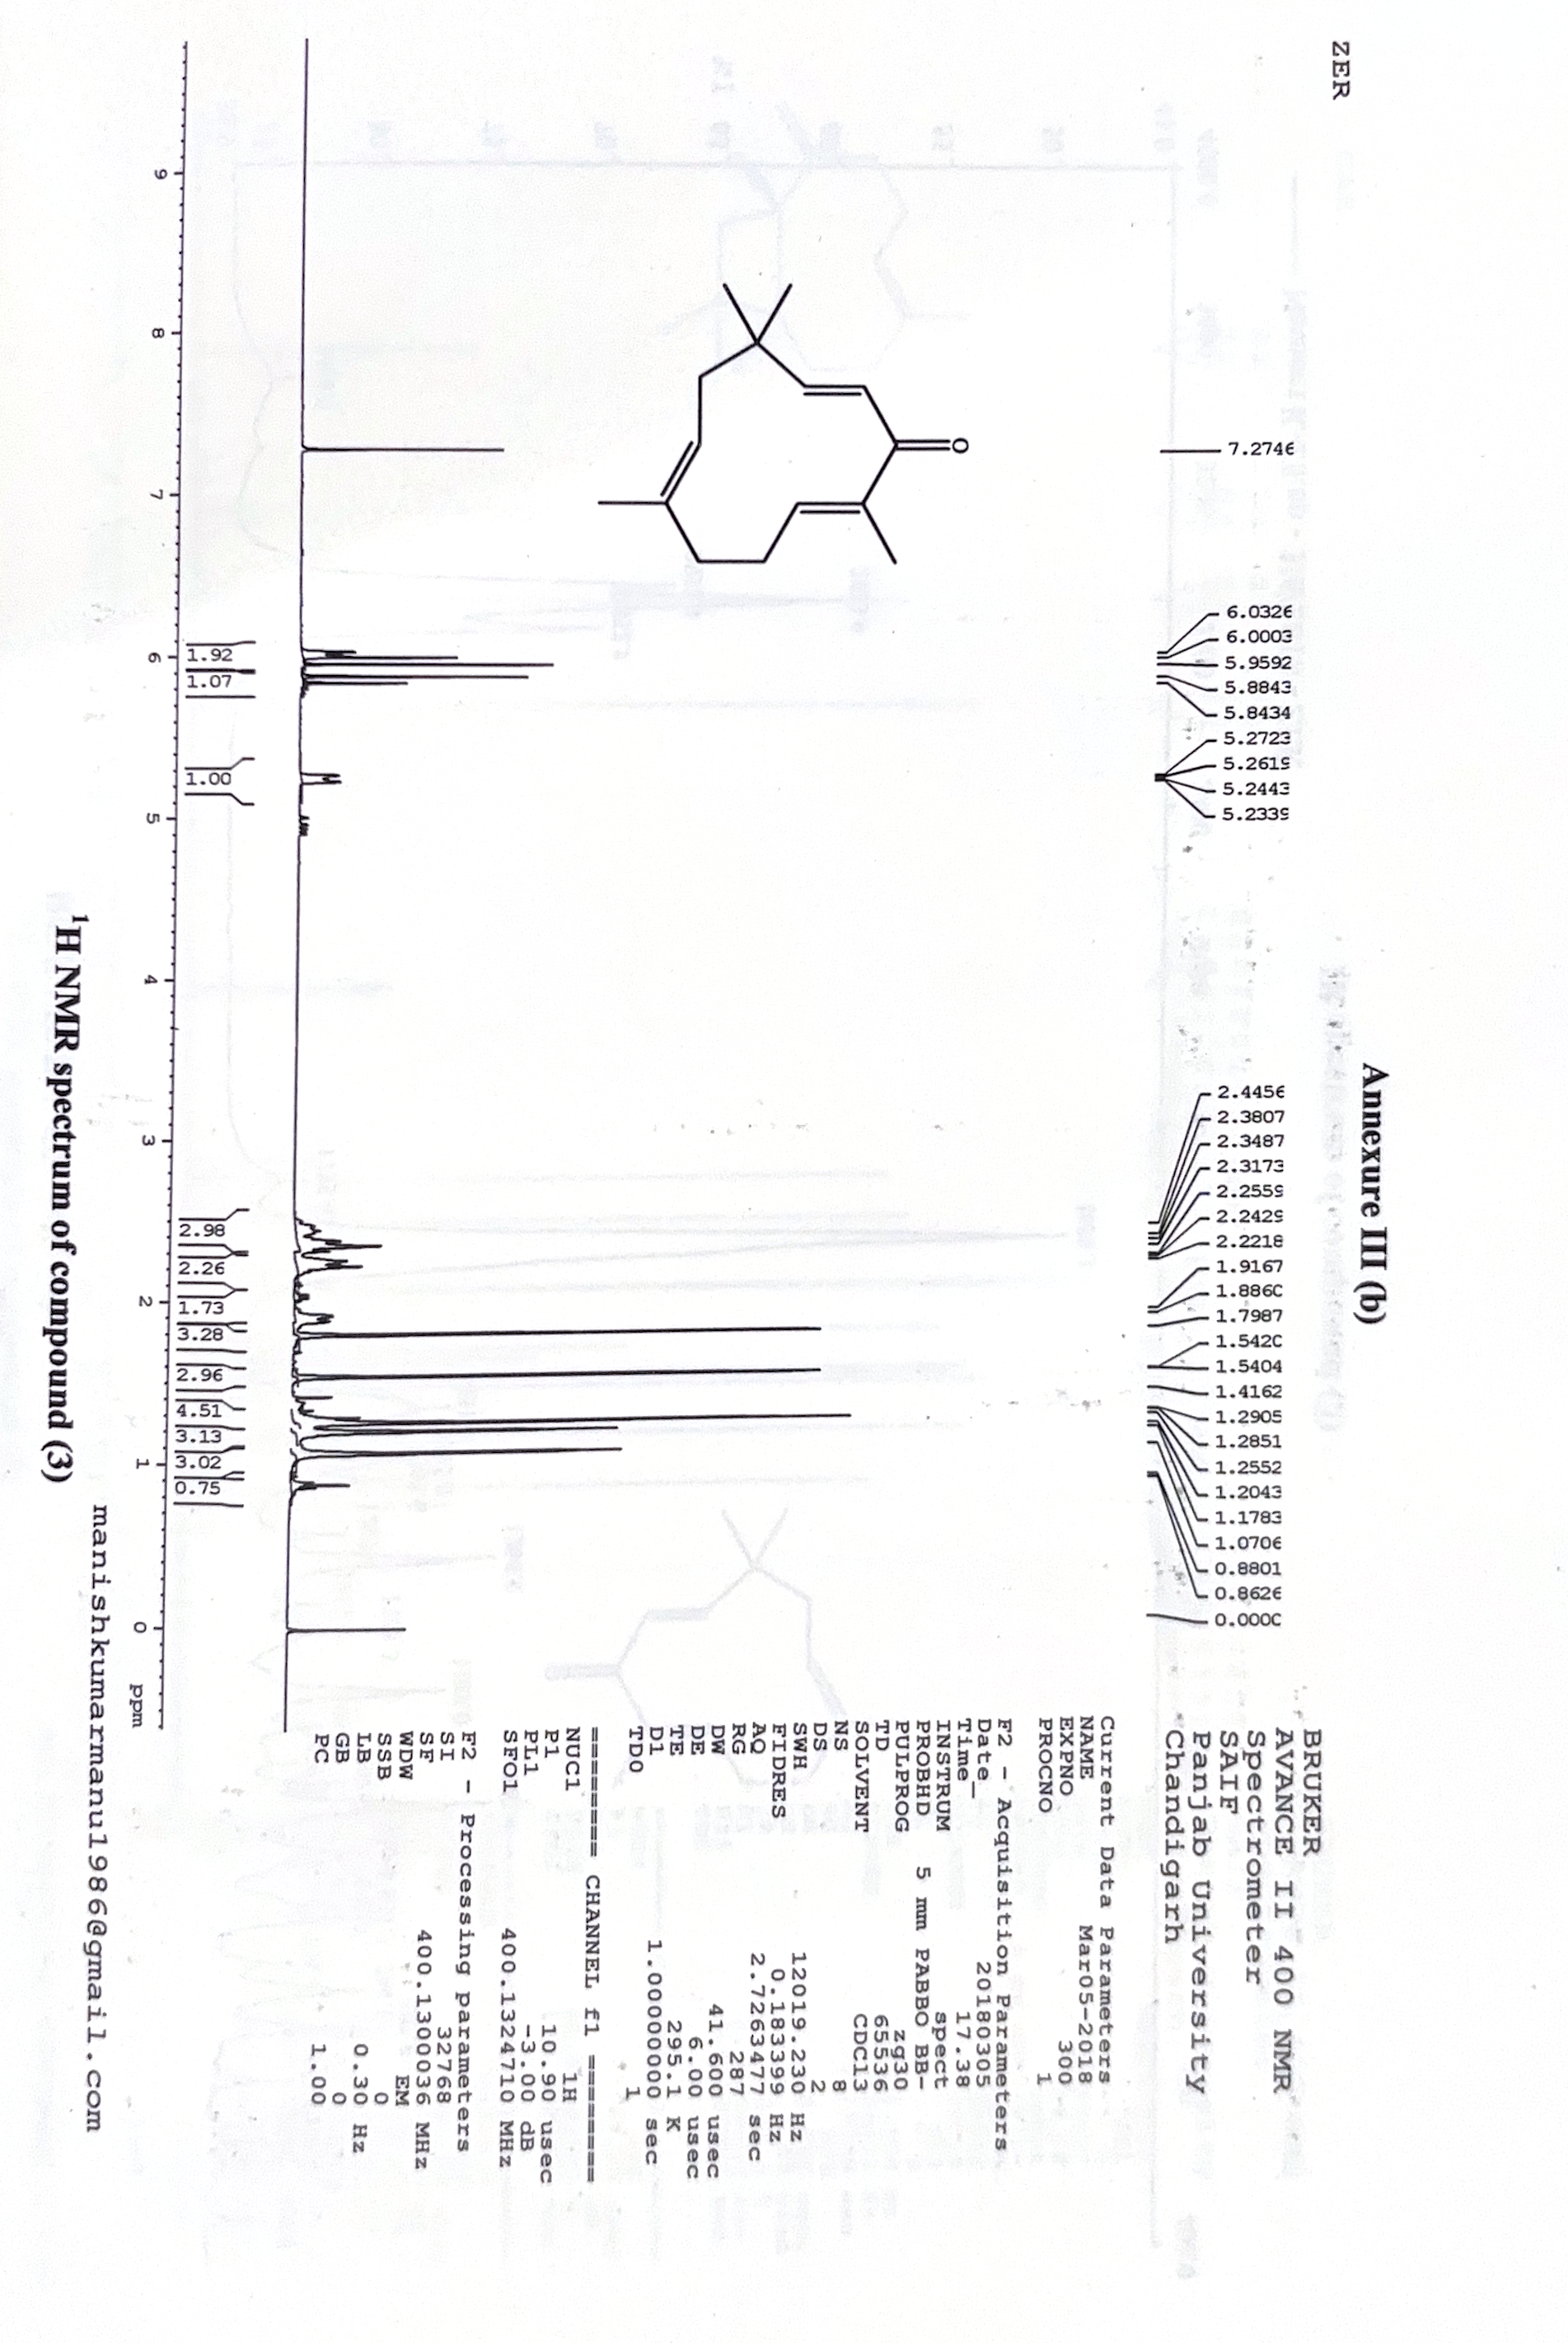

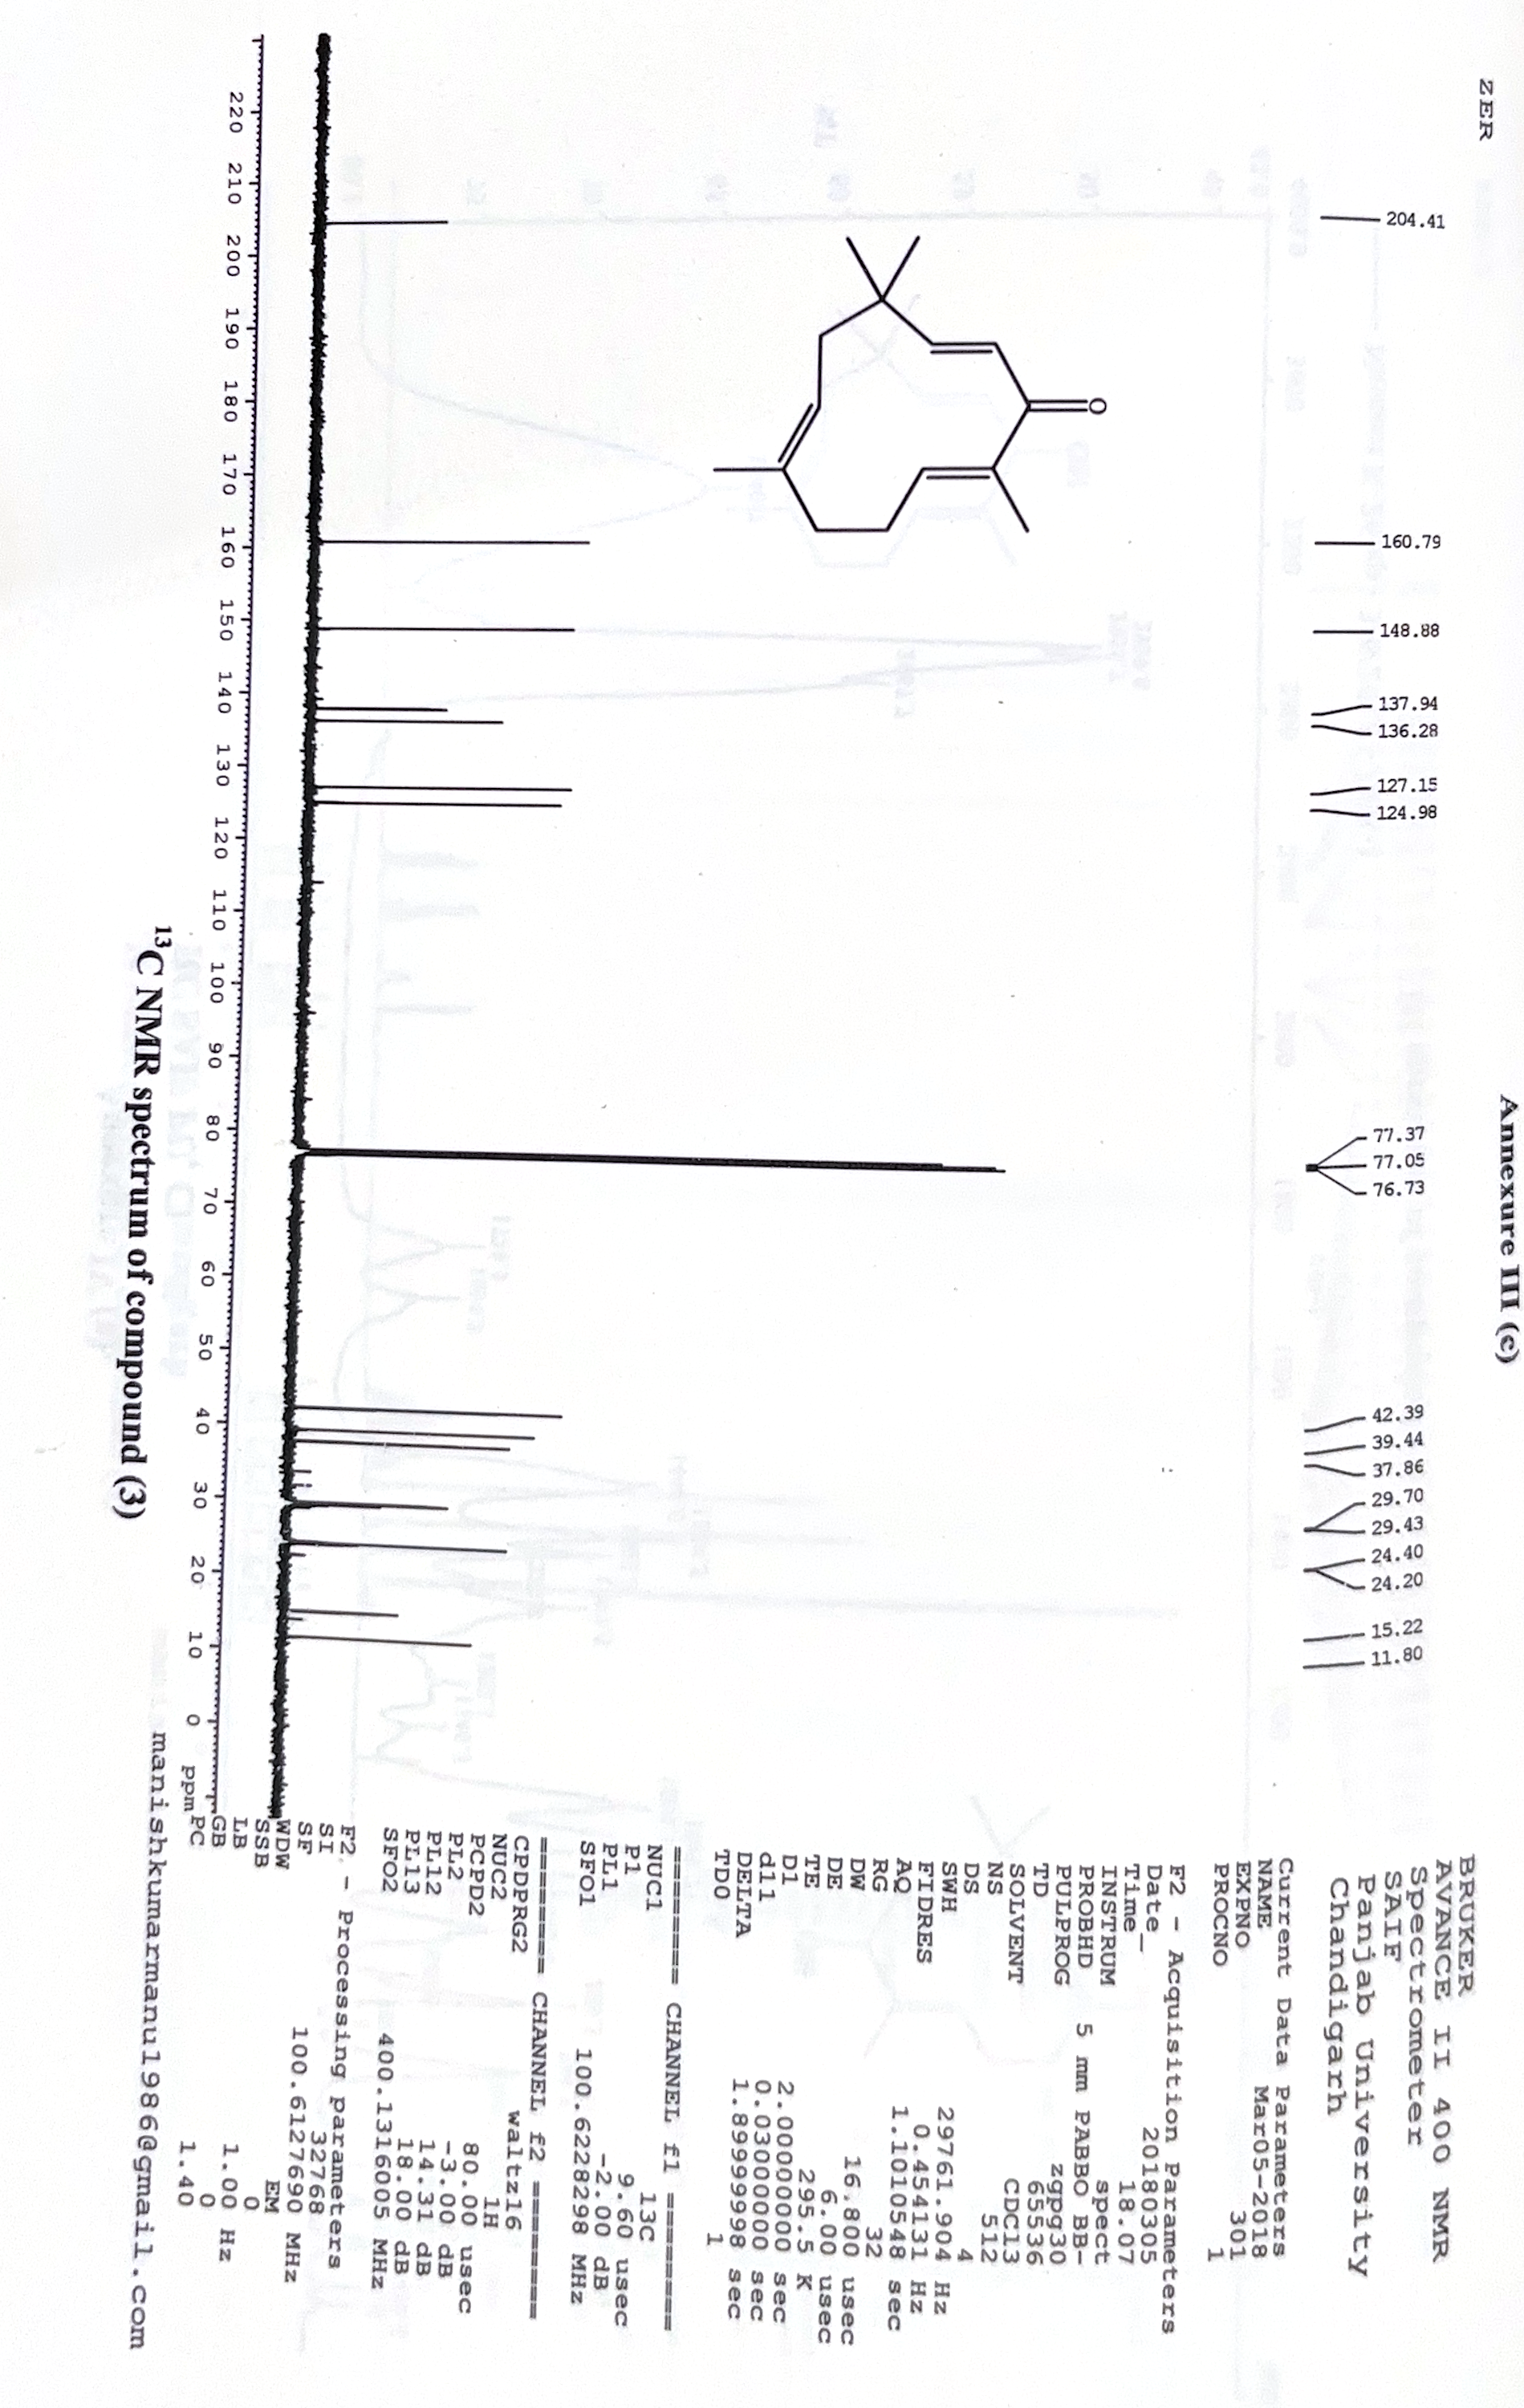

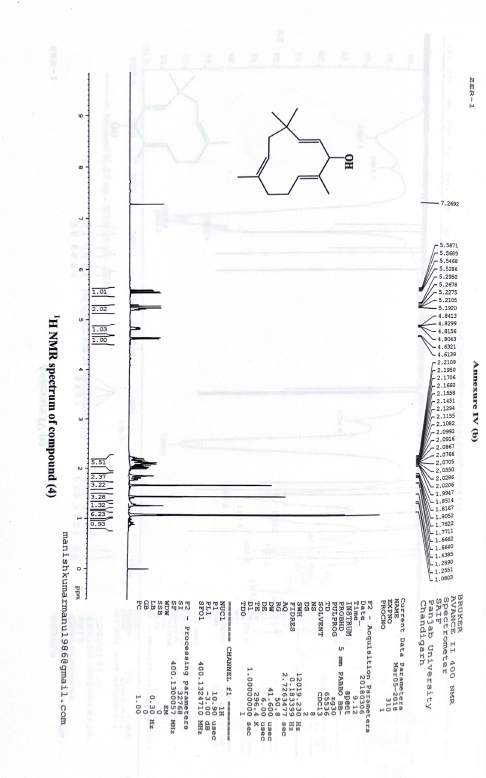


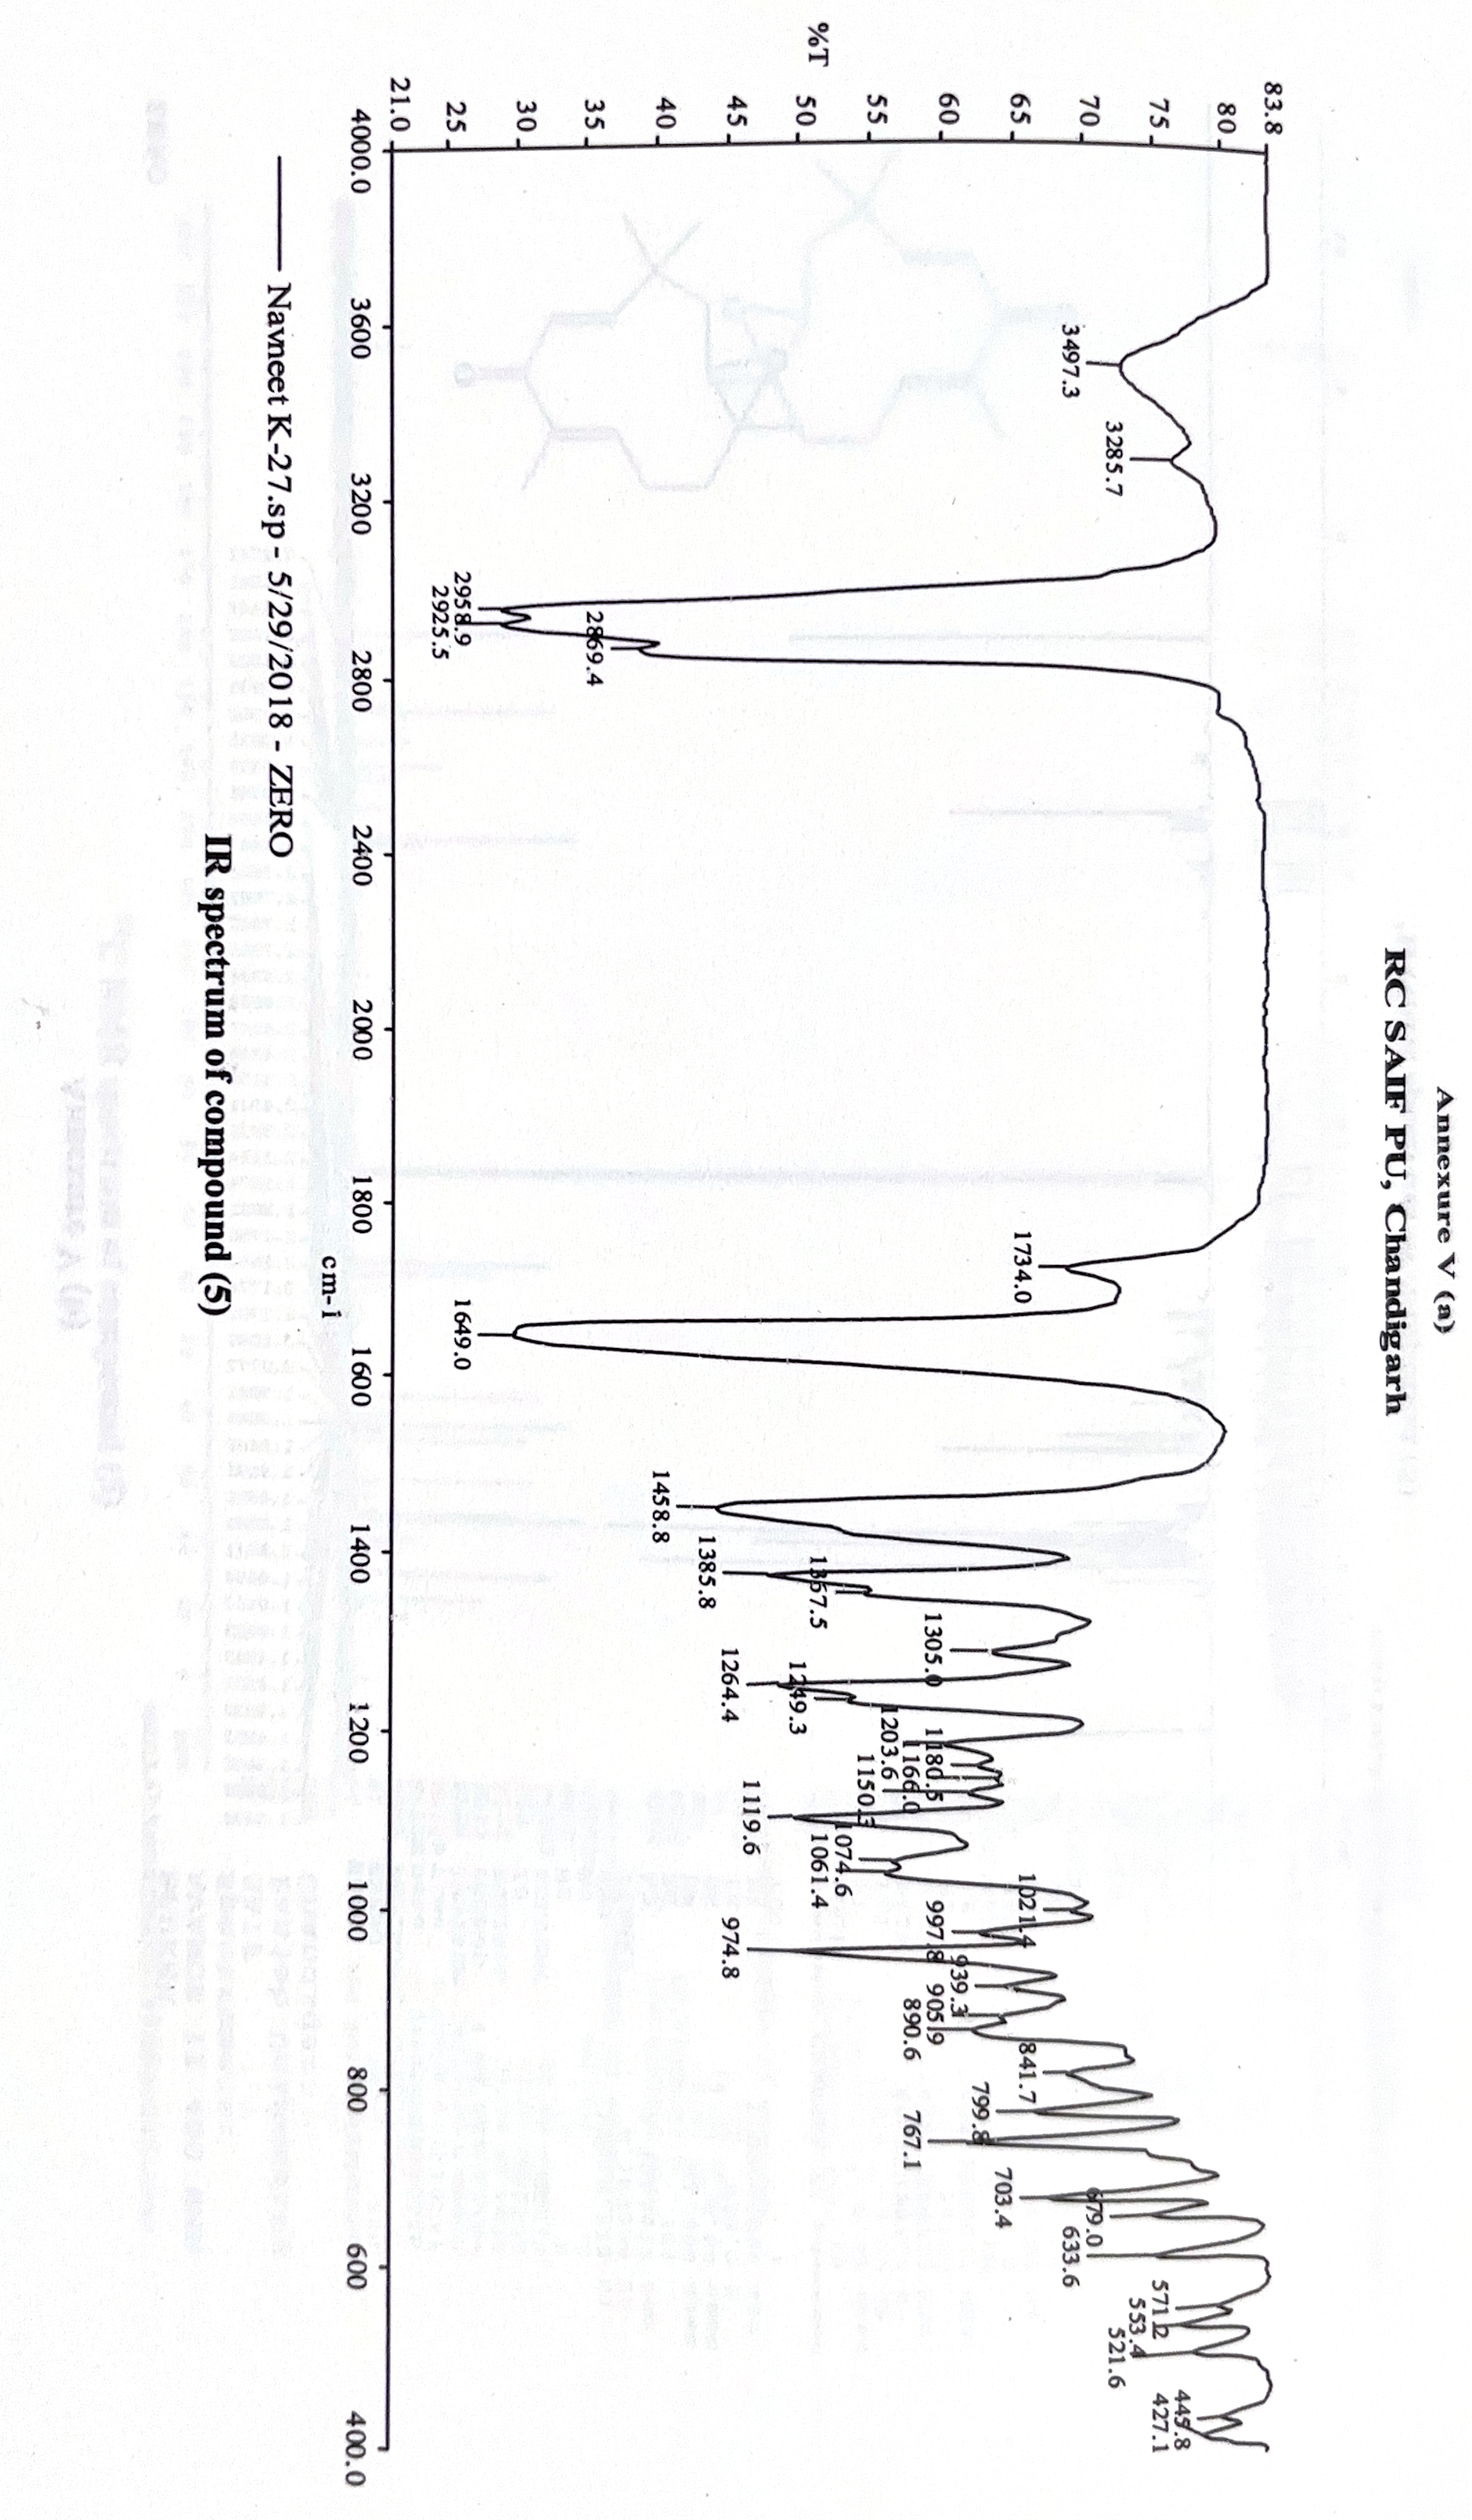

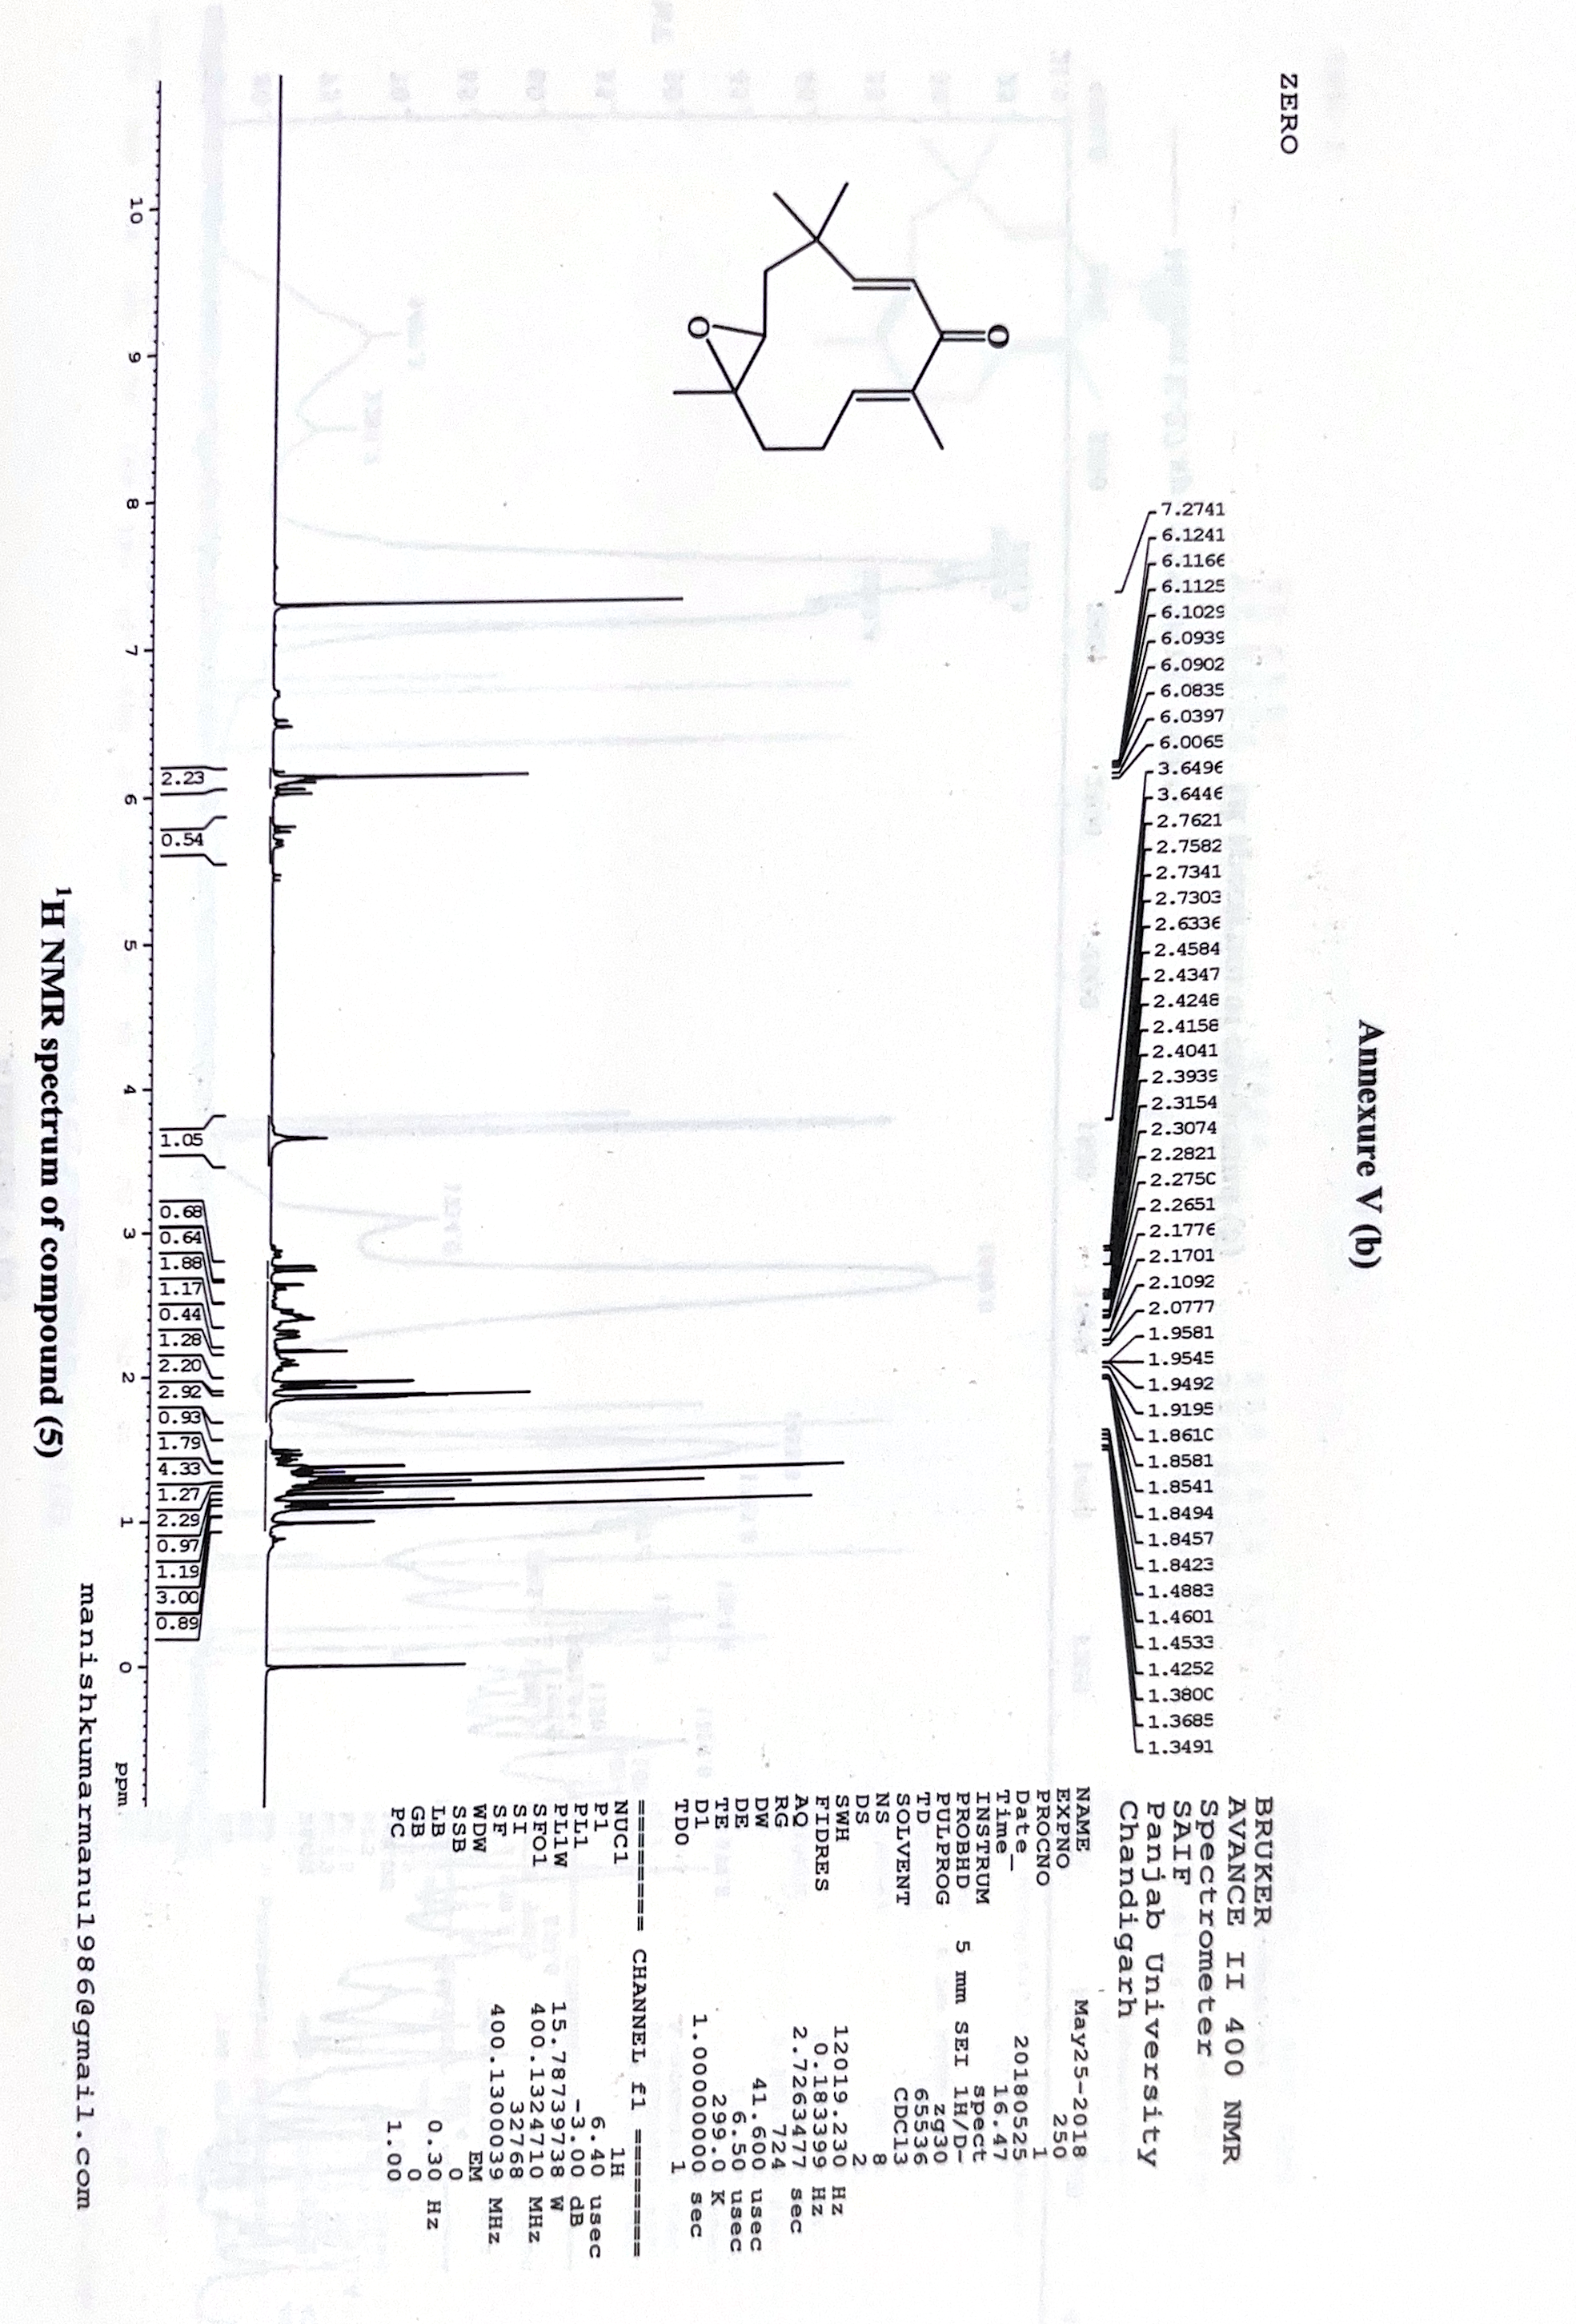

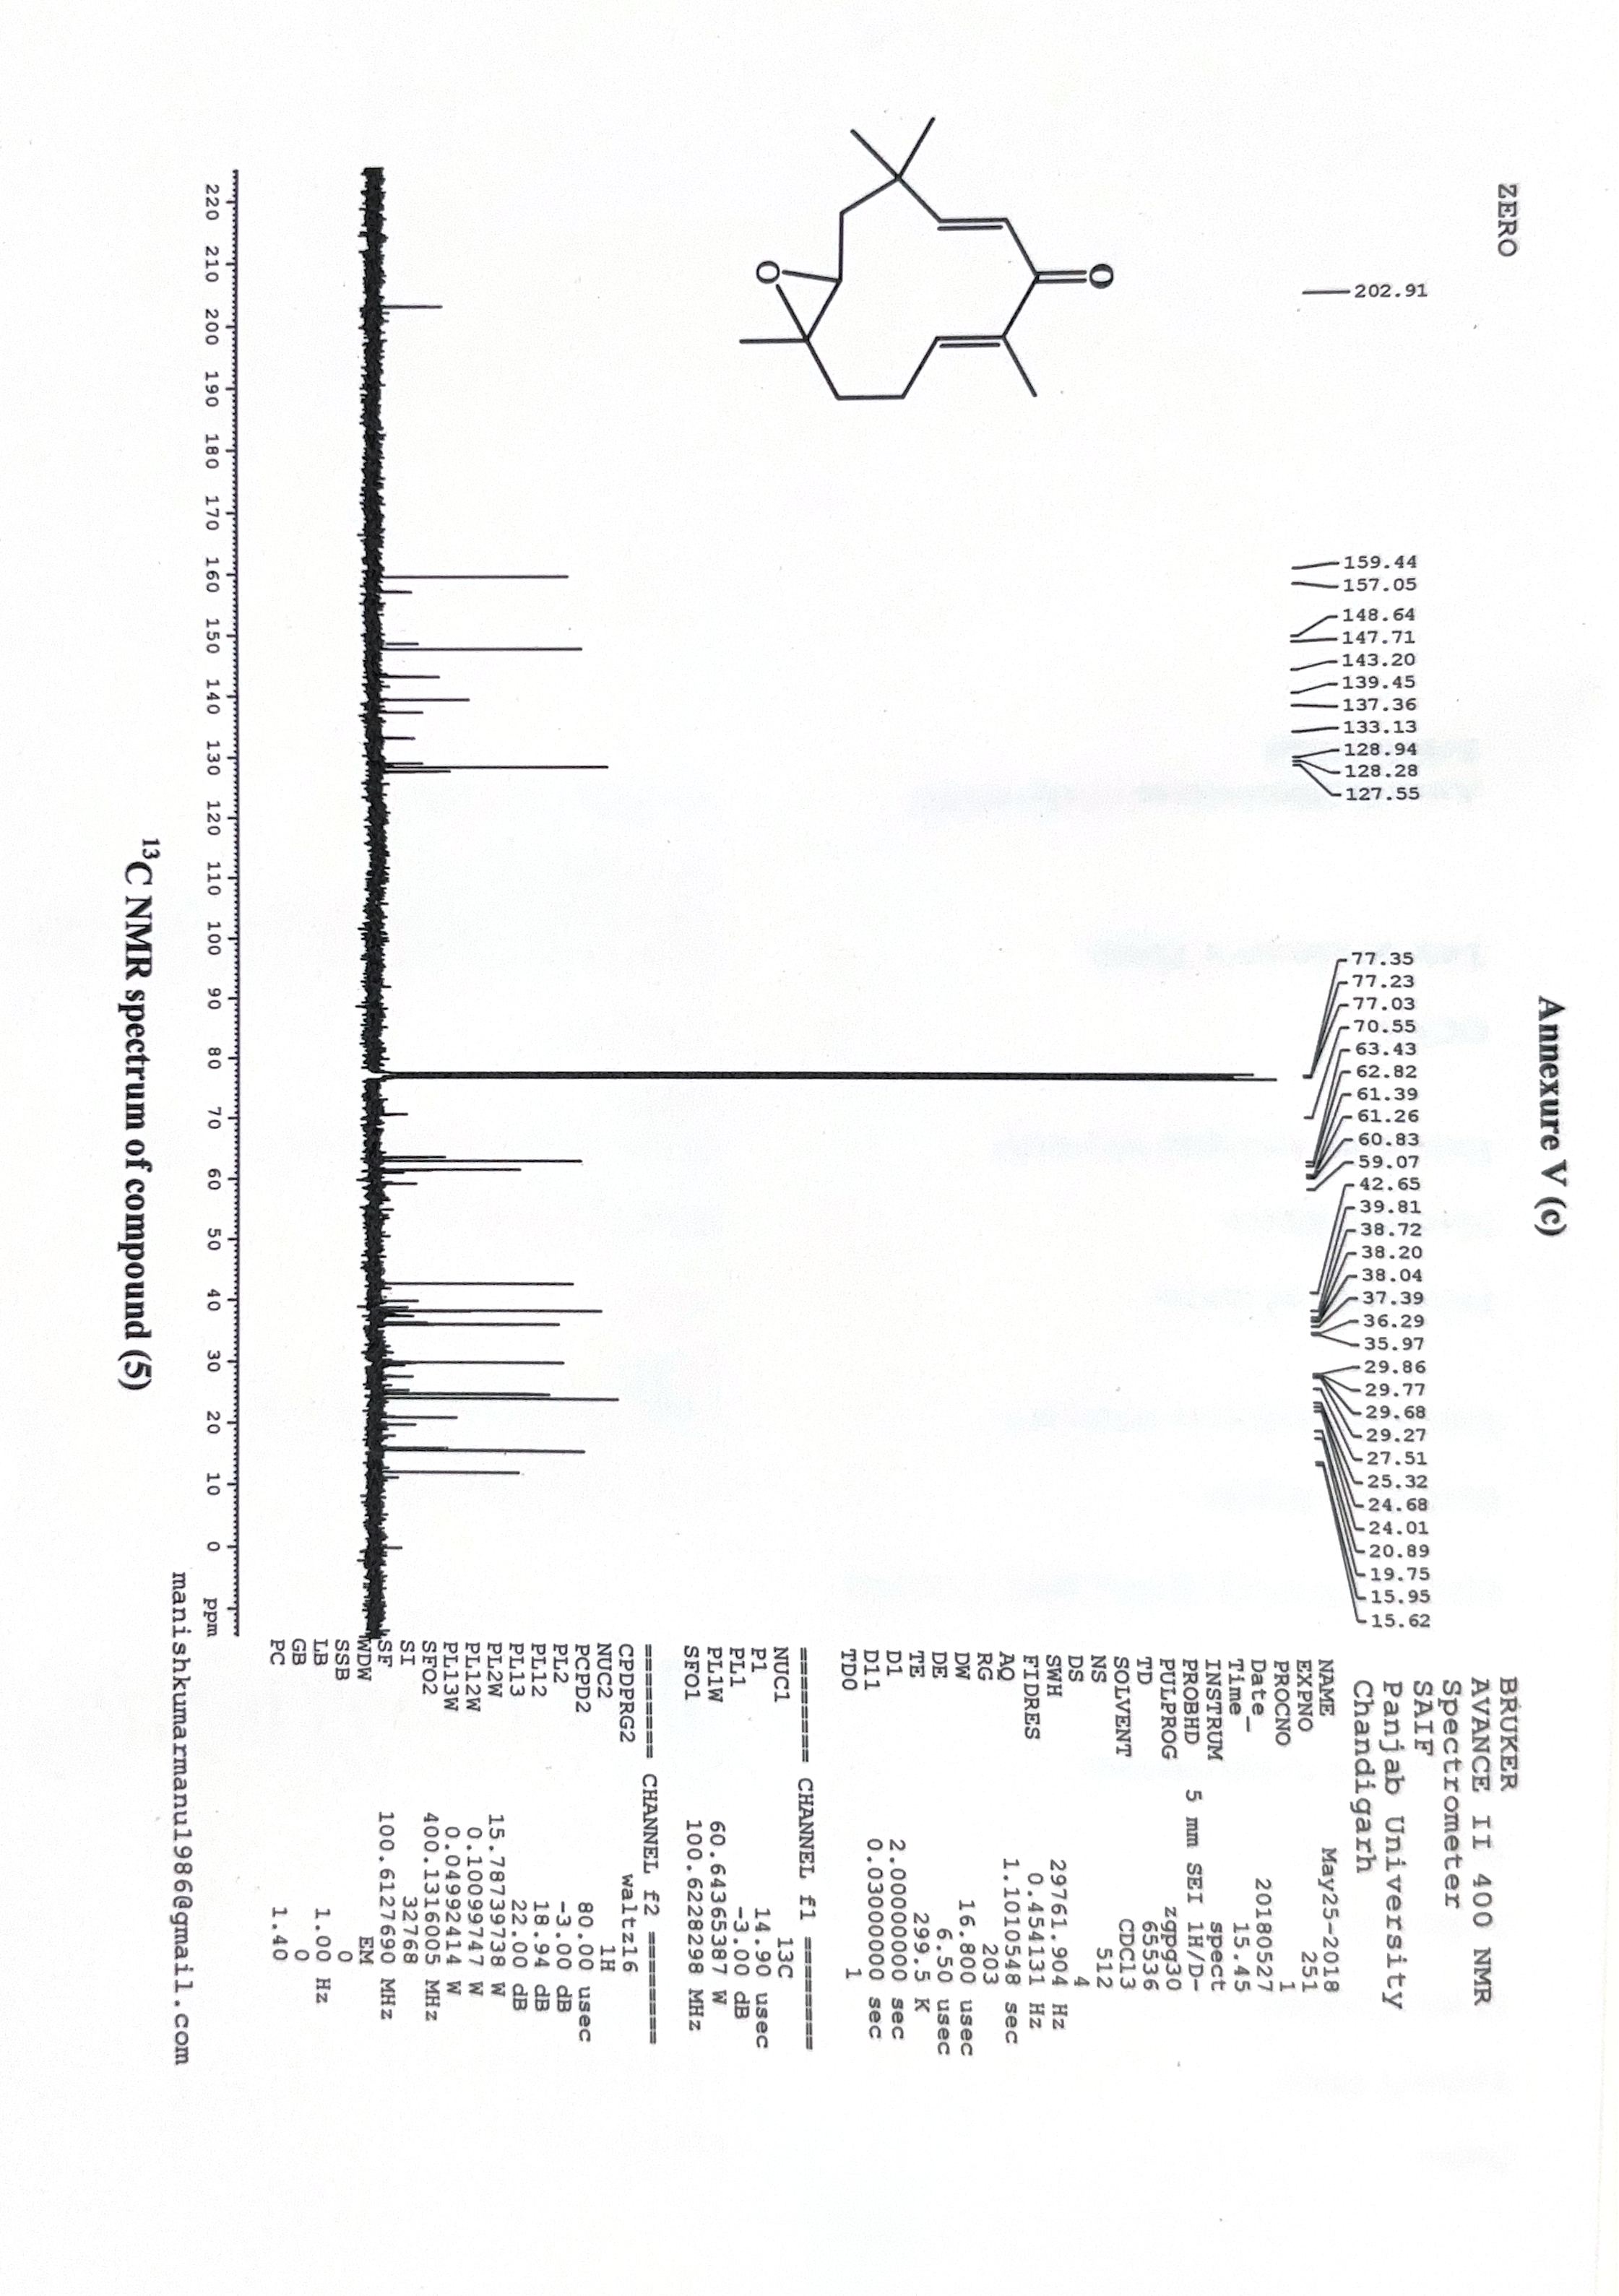

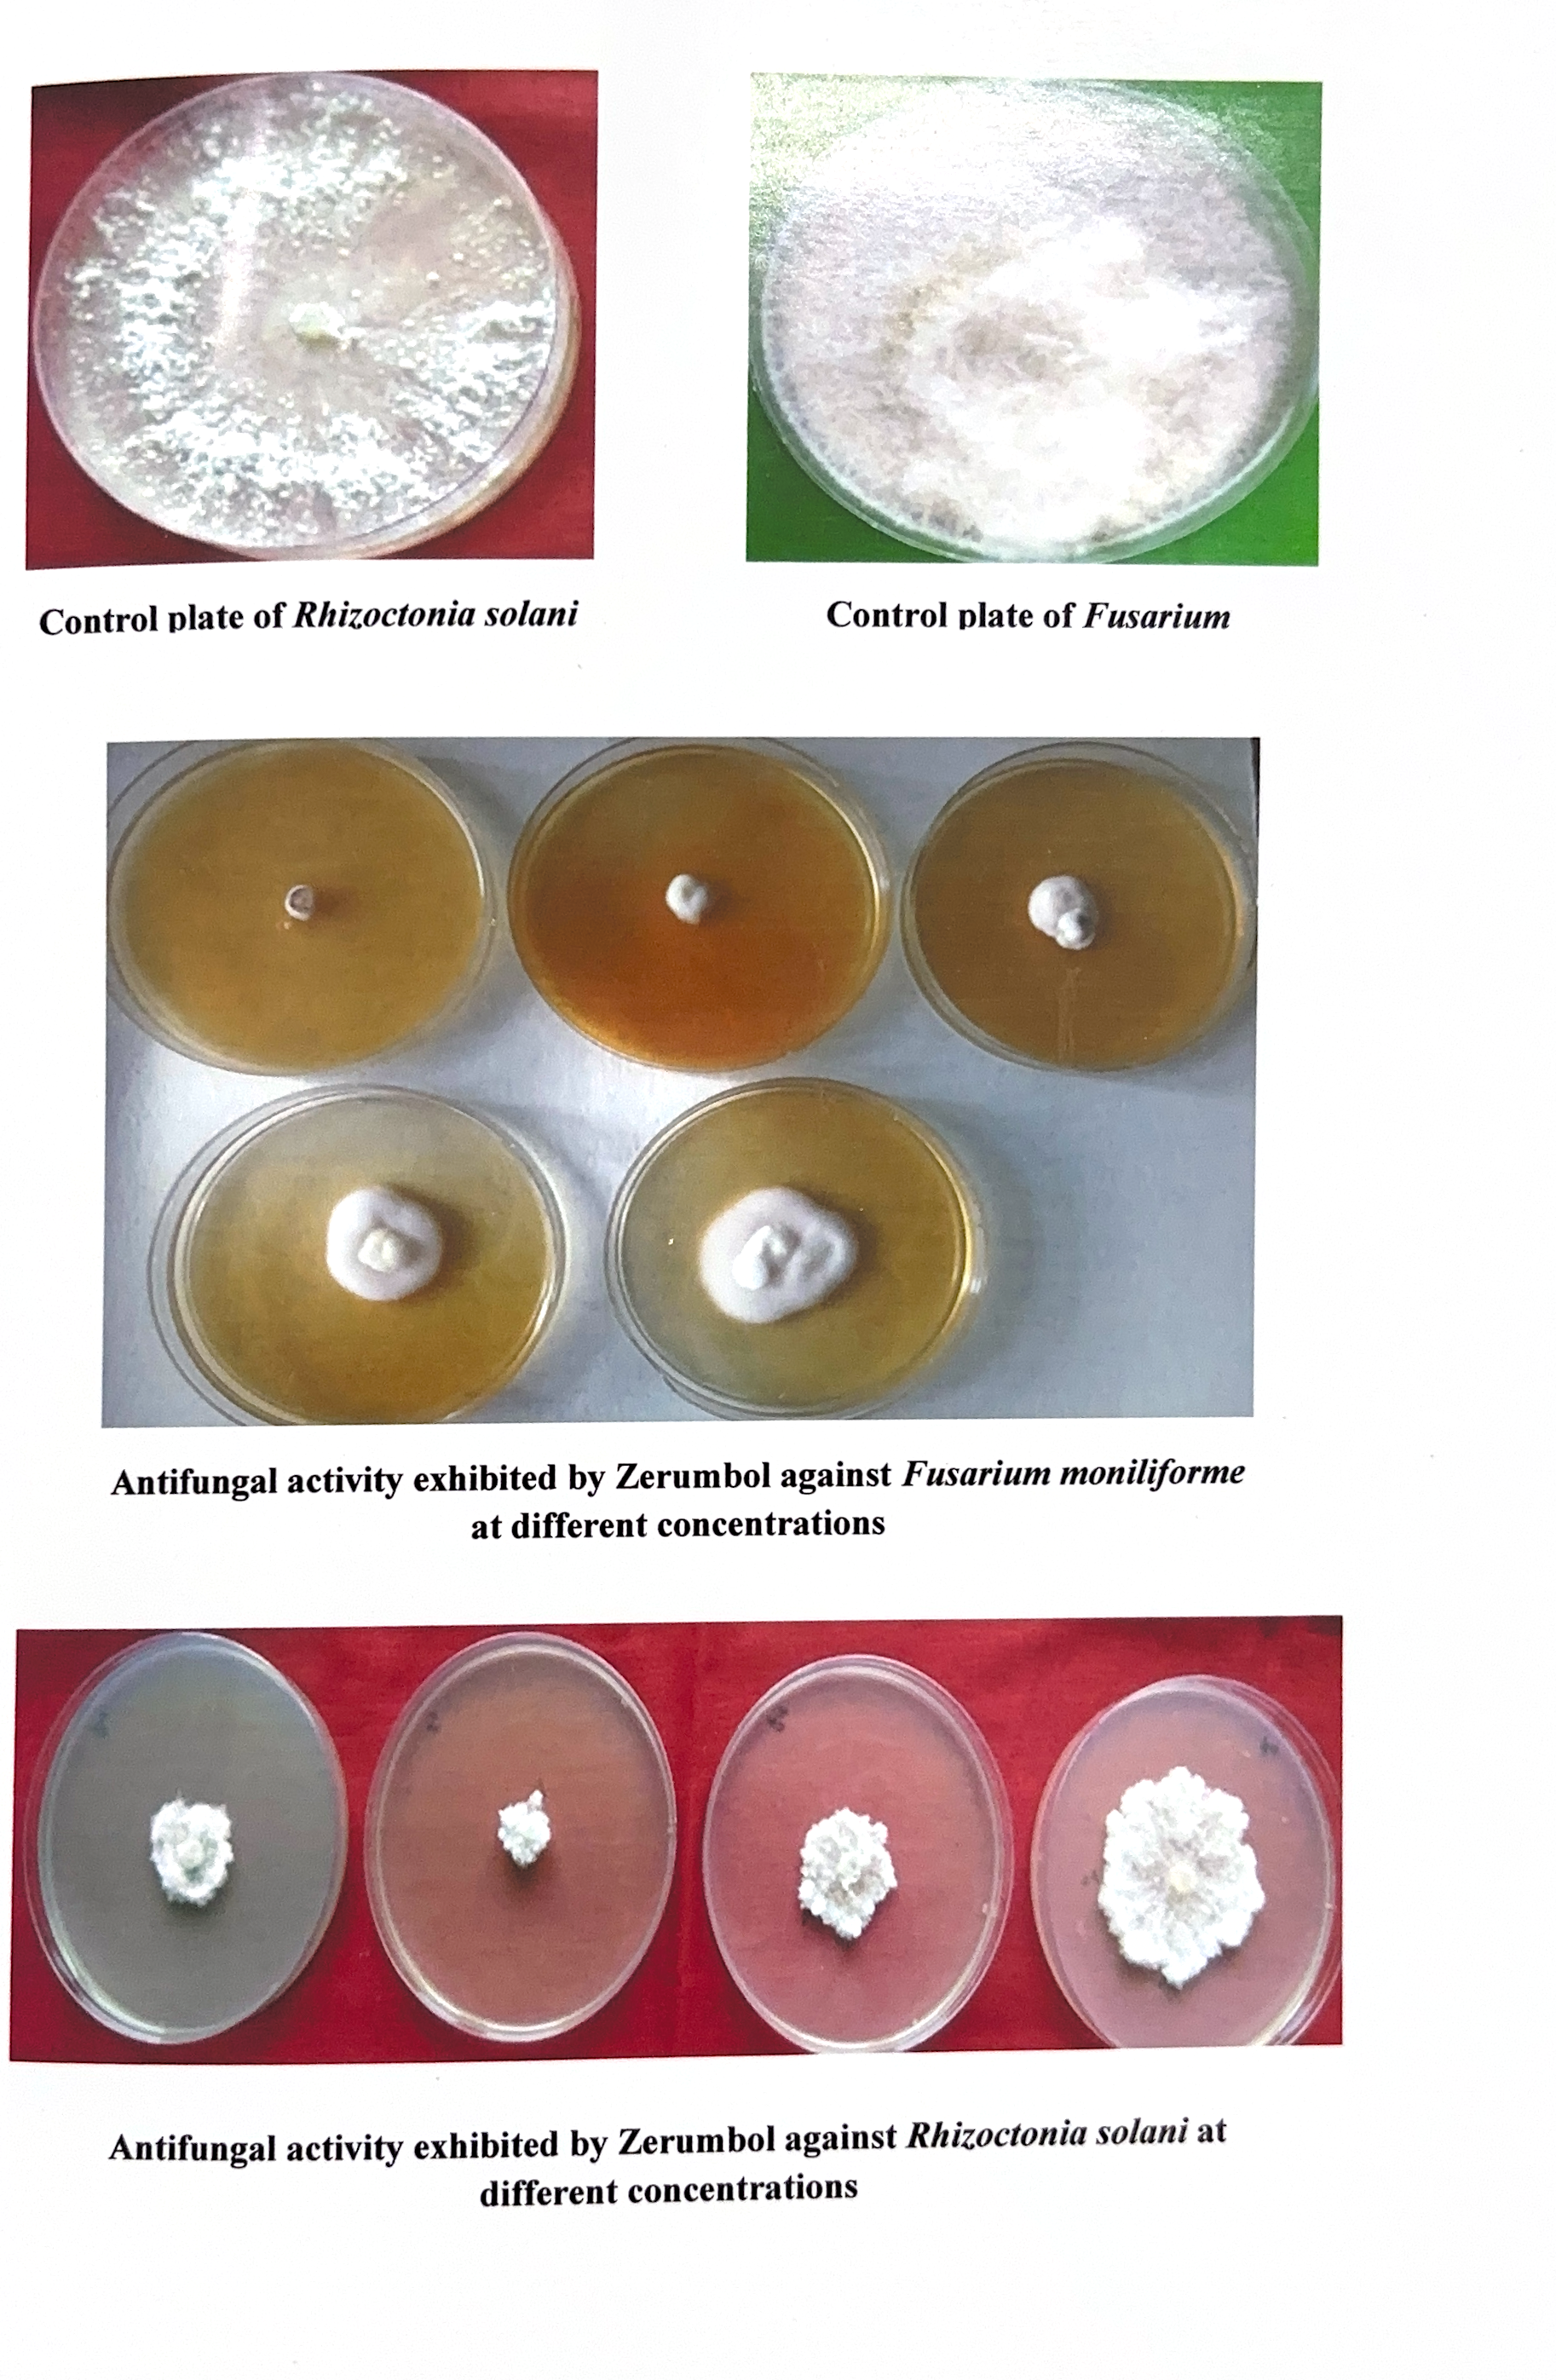

Supplement: Supplementary file 1 [file 59eed55983aeacda54bbd42a.docx]
